# Supplementary material for: Identification of a binding site on soluble RANKL that can be targeted to inhibit soluble RANK-RANKL interactions and treat osteoporosis
Source: PubMed Central journal article supplement (PMC9468151; doi:10.1038/s41467-022-33006-4), 2022-09-12

## Supplementary Informations

### Identification of a binding site on soluble RANKL that can be targeted to inhibit soluble RANK-RANKL interactions and treat osteoporosis

Dane Huang<sup>1,2,3</sup>, Chao Zhao<sup>1,3</sup>, Ruyue Li<sup>2</sup>, Bingyi Chen<sup>1</sup>, Yuting Zhang<sup>1</sup>, Zhejun Sun<sup>1</sup>, Junkang Wei<sup>1</sup>, Huihao Zhou<sup>1\*</sup>, Qiong Gu<sup>1\*</sup>, Jun Xu<sup>1\*</sup>

<sup>1</sup>Research Center for Drug Discovery, School of Pharmaceutical Sciences, Sun Yat-Sen University, Guangzhou 510006, China

<sup>2</sup>Guangdong Provincial Key Laboratory of Research and Development in Traditional Chinese Medicine, Guangdong Provincial Second Hospital of Traditional Chinese Medicine (Guangdong Provincial Engineering Technology Research Institute of Traditional Chinese Medicine), Guangzhou 510095, China

<sup>3</sup>These authors contributed equally

\*Correspondence: junxu@biochemomes.com (J.X.), guqiong@mail.sysu.edu.cn (Q.G.), zhuihao@mail.sysu.edu.cn (H.Z.)

# Supplemental Table

Supplementary Table 1 Structure of S3 modified compounds and their corresponding anti-osteoclastogenesis activity IC<sub>50</sub> and Cells cytotoxicity CC<sub>50</sub>.

| Cmpd. | Structure | IC <sub>50</sub><br>(μM) | CC <sub>50</sub><br>(μM) | Cmpd.   | Structure | IC <sub>50</sub> (μM) | CC <sub>50</sub><br>(μM) |
|-------|-----------|--------------------------|--------------------------|---------|-----------|-----------------------|--------------------------|
| S3    |           | 0.096                    | 44.59                    | S3-08   |           | 2.33                  | >100                     |
| S3-00 |           | 4.23                     | 57.17                    | S3-09   |           | 0.92                  | >100                     |
| S3-01 |           | 0.41                     | 62.31                    | S3-10   |           | 2.77                  | 41.15                    |
| S3-02 |           | 1.24                     | 41.94                    | S3-11   |           | 2.43                  | 75.18                    |
| S3-03 |           | 0.36                     | 33.85                    | S3-12   |           | 0.41                  | 65.76                    |
| S3-04 |           | Inactive                 | NT                       | S3-13   |           | 10.69                 | >100                     |
| S3-05 |           | 0.41                     | 93.93                    | S3-14   |           | 0.27                  | 76.25                    |
| S3-06 |           | 1.40                     | 201.9                    | S3-15   |           | 0.41                  | 62.50                    |
| S3-07 |           | 2.33                     | 49.10                    | S3-15-1 |           | 1.05                  | 81.24                    |

Supplementary Table 1 continued

| Cmpd.   | Structure | IC <sub>50</sub><br>( $\mu$ M) | CC <sub>50</sub><br>( $\mu$ M) | Cmpd. | Structure | IC <sub>50</sub> ( $\mu$ M) | CC <sub>50</sub><br>( $\mu$ M) |
|---------|-----------|--------------------------------|--------------------------------|-------|-----------|-----------------------------|--------------------------------|
| S3-15-2 |           | 1.26                           | >100                           | S3-18 |           | Inactive                    | 52.58                          |
| S3-15-3 |           | 3.59                           | 62.75                          | S3-19 |           | 9.49                        | 77.86                          |
| S3-15-4 |           | 0.62                           | 57.25                          | S3-20 |           | 8.71                        | >100                           |
| S3-16   |           | 0.73                           | 69.21                          | S3-21 |           | 0.95                        | >100                           |
| S3-17   |           | 6.74                           | 82.10                          | S3-22 |           | 0.40                        | 81.24                          |

Supplementary Table 2 Structures, inhibition effects, SPR results with sRANKL and key atoms  
NBO charges of partial S3 series.

| Cmpd. | Structure                                                                           | OC inhibition (IC <sub>50</sub> μM) | SPR response curves                                                                 | SPR equilibrium analysis                                                                               | NBO charge                                                    |
|-------|-------------------------------------------------------------------------------------|-------------------------------------|-------------------------------------------------------------------------------------|--------------------------------------------------------------------------------------------------------|---------------------------------------------------------------|
| S3    | 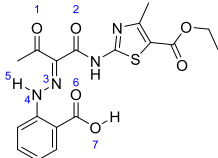   | 0.096                               |    | <br>KD = 34.8 μM    | 1: -0.600<br>3: -0.121<br>6: -0.648<br>7: -0.681              |
| S3-01 |    | 0.41                                |    | <br>KD = 211 μM     | 1: -0.604<br>3: -0.123<br>6: -0.636<br>9: 0.440               |
| S3-15 |   | 0.19                                |   | <br>KD = 33.7 μM   | 1: -0.628<br>2: -0.674<br>7: -0.682<br>10: -0.491<br>8: 0.512 |
| S3-10 |  | 2.77                                |  | <br>KD = 0.136 M  | 1: -0.584<br>2: -0.528                                        |
| S3-05 |  | 0.41                                |  | <br>KD = 23.6 μM  | 1: -0.587<br>6: -0.631                                        |
| S3-08 |  | 2.34                                |  | <br>KD = 38.90 μM |                                                               |

Supplementary Table 2 continued

| Cmpd. | Structure                                                                           | OC inhibition<br>(IC <sub>50</sub> μM) | SPR<br>response curves                                                               | SPR equilibrium analysis                                                                              | NBO<br>charge                                                  |
|-------|-------------------------------------------------------------------------------------|----------------------------------------|--------------------------------------------------------------------------------------|-------------------------------------------------------------------------------------------------------|----------------------------------------------------------------|
| S3-09 | 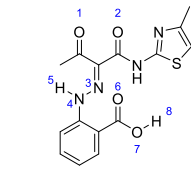   | 0.26                                   |    | <br>KD = 33.7 μM   | 1: -0.574<br>2: -0.621<br>6: -0.606<br>8: 0.5.4                |
| S3-11 |    | 2.43                                   |    | <br>KD = 0.319 M   | 1: -0.582<br>10: -0.525<br>8: 0.506<br>13: 0.225               |
| S3-04 |   | 10                                     |   | N/A                                                                                                   | 1: -0.573<br>10: -0.539<br>8: 0.509<br>13: 0.503               |
| S3-00 |  | 4.23                                   |  | N/A                                                                                                   | 1: -0.577                                                      |
| S3-07 |  | inactive                               |  | N/A                                                                                                   | 2: -0.606<br>5: 0.435                                          |
| S3-03 |  | 0.36                                   |  | <br>KD = 33.7 μM | 1: -0.569<br>3: -0.630<br>10: -0.542                           |
| S3-02 |  | 1.24                                   |  | <br>KD = 38.0 μM | 1: -0.550<br>2: -0.634<br>3: -0.641<br>4: -0.689<br>12: -0.605 |

Supplementary Table 3. Compound **S3-15** binding proteins from cell culture supernatant.

| UniProtKB | Description                                                | Coverage [%] | # Peptides | # PSMs | # Unique Peptides | MW [kDa] | Source      |
|-----------|------------------------------------------------------------|--------------|------------|--------|-------------------|----------|-------------|
| O14788    | Tumor necrosis factor ligand superfamily member 11 (RANKL) | 4            | 2          | 93     | 2                 | 35.5     | 19 kDa band |
| P35979    | 60S ribosomal protein L12                                  | 5            | 1          | 2      | 1                 | 17.8     | 19 kDa band |
| P02798    | Metallothionein-2                                          | 20           | 1          | 1      | 1                 | 6.1      | 19 kDa band |
| P24369    | Peptidyl-prolyl cis-trans isomerase B                      | 6            | 1          | 1      | 1                 | 23.7     | 19 kDa band |
| Q61171    | Peroxiredoxin-2                                            | 5            | 1          | 2      | 1                 | 21.8     | 19 kDa band |
| O08807    | Peroxiredoxin-4                                            | 5            | 1          | 2      | 1                 | 17.8     | 19 kDa band |

Supplementary Table4. Compound **S3-15** binding proteins from cell whole protein lysate.

| UniProtKB | Description                                                                                   | Coverage [%] | # Peptides | # PSMs | # Unique Peptides | MW [kDa] | Source       |
|-----------|-----------------------------------------------------------------------------------------------|--------------|------------|--------|-------------------|----------|--------------|
| P60867    | 40S ribosomal protein S20                                                                     | 16           | 2          | 4      | 2                 | 13.4     | 19 kDa band  |
| O14788    | Tumor necrosis factor ligand superfamily member 11 (RANKL)                                    | 3            | 1          | 4      | 1                 | 35.5     | 19 kDa band  |
| Q9D358    | Low molecular weight phosphotyrosine protein phosphatase                                      | 6            | 1          | 1      | 1                 | 18.2     | 19 kDa band  |
| Q01768    | Nucleoside diphosphate kinase B                                                               | 6            | 1          | 1      | 1                 | 17.4     | 19 kDa band  |
| Q61171    | Peroxiredoxin-2                                                                               | 18           | 3          | 7      | 3                 | 21.8     | 19 kDa band  |
| P60867    | 40S ribosomal protein S20                                                                     | 16           | 2          | 4      | 2                 | 13.4     | 19 kDa band  |
| P16460    | Argininosuccinate synthase                                                                    | 20           | 11         | 26     | 11                | 46.6     | 43 kDa band  |
| Q8BR37    | E3 ubiquitin-protein ligase NHLRC1                                                            | 5            | 1          | 2      | 1                 | 42.7     | 43 kDa band  |
| P45952    | Medium-chain specific acyl-CoA dehydrogenase, mitochondrial                                   | 3            | 1          | 2      | 1                 | 46.5     | 43 kDa band  |
| P09411    | Phosphoglycerate kinase 1                                                                     | 15           | 4          | 7      | 4                 | 44.5     | 43 kDa band  |
| P11680    | Properdin                                                                                     | 7            | 2          | 6      | 2                 | 50.3     | 43 kDa band  |
| Q9JJX8    | Serine/threonine-protein kinase 32B                                                           | 5            | 1          | 1      | 1                 | 47.9     | 43 kDa band  |
| Q9Z0H3    | SWI/SNF-related matrix-associated actin-dependent regulator of chromatin subfamily B member 1 | 3            | 1          | 2      | 1                 | 44.1     | 43 kDa band  |
| Q9JHJ0    | Tropomodulin-3                                                                                | 6            | 2          | 4      | 2                 | 39.5     | 43 kDa band  |
| O14788    | Tumor necrosis factor ligand superfamily member 11 (RANKL)                                    | 3            | 1          | 7      | 1                 | 35.5     | 43 kDa band  |
| A2A8Z1    | Oxysterol-binding protein-related protein 9                                                   | 6            | 4          | 6      | 4                 | 83.1     | 72 kDa band  |
| Q62148    | Retinal dehydrogenase 2                                                                       | 2            | 1          | 1      | 1                 | 56.6     | 72 kDa band  |
| O35305    | Tumor necrosis factor receptor superfamily member 11A                                         | 2            | 1          | 1      | 1                 | 66.6     | 72 kDa band  |
| O08784    | Treacle protein                                                                               | 2            | 2          | 4      | 2                 | 134.9    | 130 kDa band |

Supplementary Table 5. Compound **S3-15** specific binding proteins from rat serum.

| UniProtKB  | Description                                             | Coverage [%] | # Peptides | # PSMs | # Unique Peptides | MW [kDa] | Source      |
|------------|---------------------------------------------------------|--------------|------------|--------|-------------------|----------|-------------|
| B0BNJ1     | LOC683667 protein                                       | 15           | 3          | 5      | 3                 | 21.6     | 19 kDa band |
| A0A140TAC5 | 60S ribosomal protein L12                               | 5            | 1          | 1      | 1                 | 17.9     | 19 kDa band |
| P31399     | ATP synthase subunit d, mitochondrial                   | 7            | 1          | 1      | 1                 | 18.8     | 19 kDa band |
| G3V794     | Tumor necrosis factor ligand superfamily member (RANKL) | 13           | 6          | 56     | 6                 | 35.3     | 19 kDa band |
| P27139     | Carbonic anhydrase 2                                    | 7            | 2          | 4      | 2                 | 29.1     | 26 kDa band |
| G3V794     | Tumor necrosis factor ligand superfamily member (RANKL) | 18           | 6          | 50     | 6                 | 35.3     | 26 kDa band |
| P29975     | Aquaporin-1                                             | 4            | 1          | 1      | 1                 | 28.8     | 26 kDa band |
| P00406     | Cytochrome c oxidase subunit 2                          | 3            | 1          | 1      | 1                 | 25.9     | 26 kDa band |
| G3V913     | Heat shock 27kDa protein 1                              | 10           | 2          | 2      | 2                 | 22.8     | 26 kDa band |
| P57113     | Maleylacetoacetate isomerase                            | 15           | 3          | 3      | 3                 | 23.9     | 26 kDa band |
| F1M8Z6     | TNF receptor superfamily member 11A                     | 2            | 1          | 1      | 1                 | 67.6     | 26 kDa band |
| F1LTN6     | Uncharacterized protein                                 | 42           | 11         | 144    | 10                | 24.9     | 26 kDa band |
| A0A0G2K3Z9 | Uncharacterized protein                                 | 15           | 3          | 7      | 3                 | 22.2     | 26 kDa band |
| A0A0G2K3K2 | Actin, cytoplasmic 1                                    | 3            | 1          | 1      | 1                 | 42.1     | 55 kDa band |
| G3V794     | Tumor necrosis factor ligand superfamily member         | 15           | 4          | 17     | 4                 | 35.3     | 55 kDa band |
| A0A0G2K477 | Uncharacterized protein                                 | 17           | 6          | 16     | 3                 | 51.1     | 55 kDa band |

## Supplemental Figures

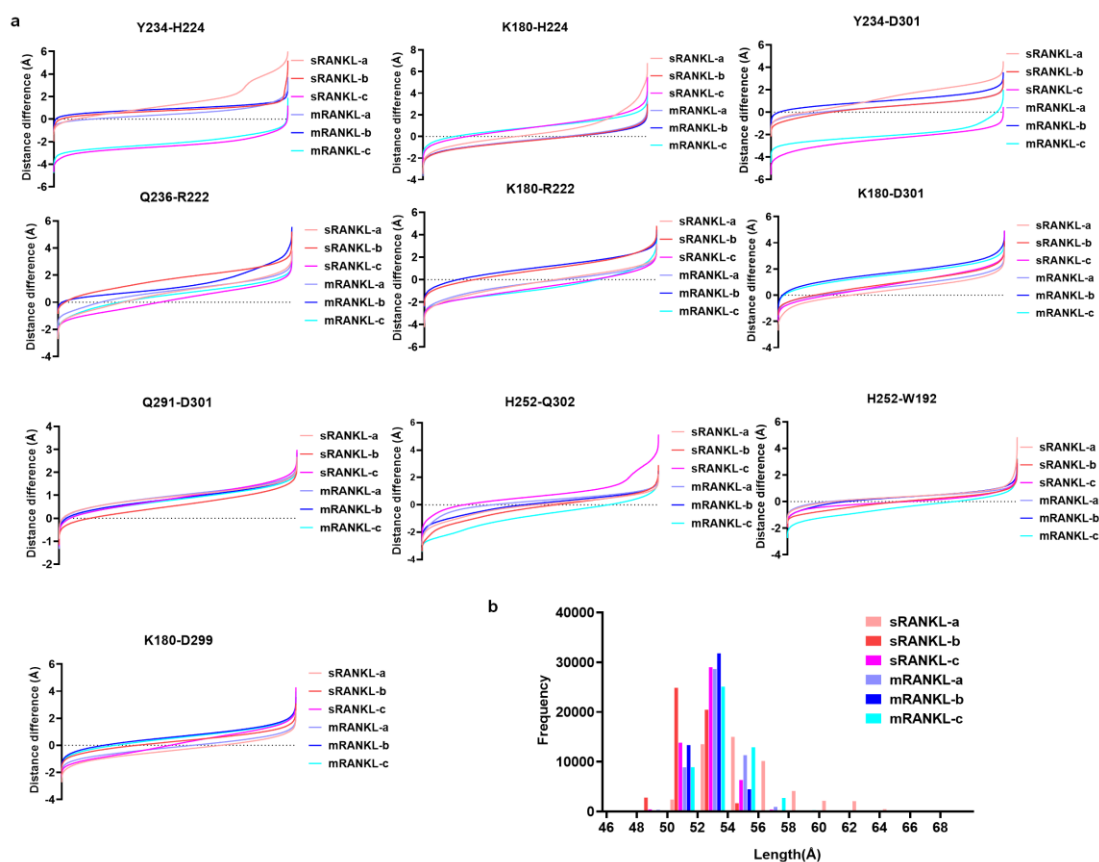

**Supplementary Fig 1. Molecular Simulation for The Identify of mouse sRANKL Selective Binding Pocket.**

**a** The distance change between residues of Y234- H224, K180-H224, Y234-D301, Q236-R222, K180-R222, K180-D301, Q291-D301, H252-Q302, H252-W192, and K180-D299 in mouse sRANKL (PDB ID: 1S55) during 100 ns MD simulation at the fix and free state. The distance change = distance in sRANKL or fixed-RANKL- the distance in crystal structure (PDB ID: 1S55). The number of distance change is aligned from small to large. Overall, most of them in both sRANKL and fixed-RANKL were getting larger. H252-Q302, H252-W192 in both sRANKL and mRANKL were maintained. In Y234- H224, Y234-D301 and Q236-R222, sRANKL exhibited larger changing than mRANKL in most of times. **b** The frequency of distance summation of Y234-H224, K180-H224, Y234-H224 and Y234-D303 of mouse sRANKL (PDB ID: 1S55) in free or fixed state during 100 ns MD simulation.



**a1**

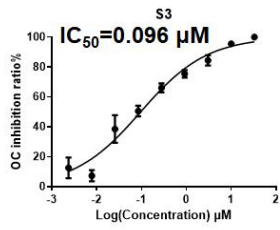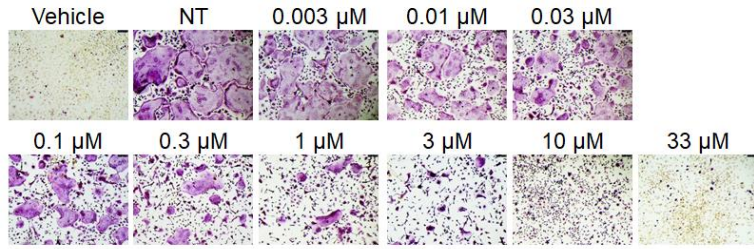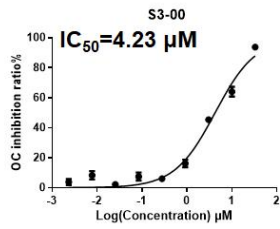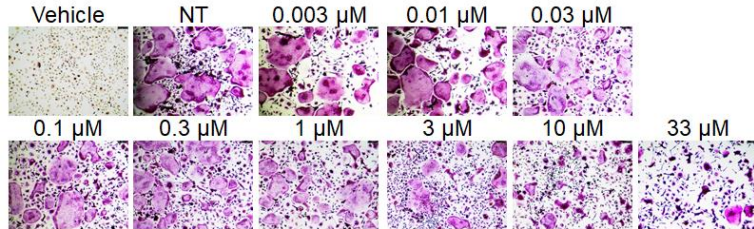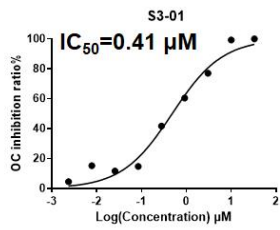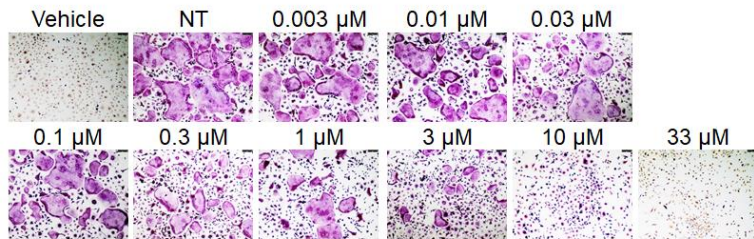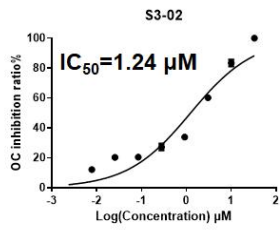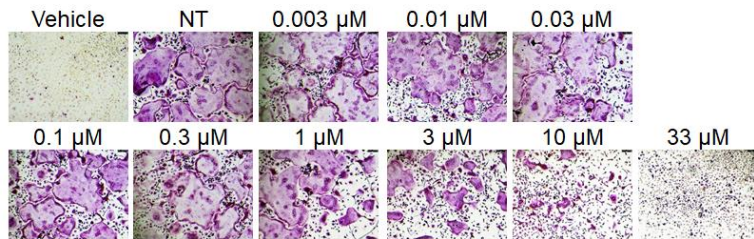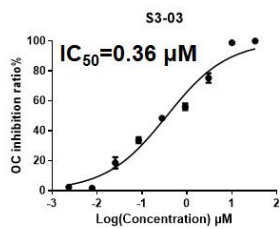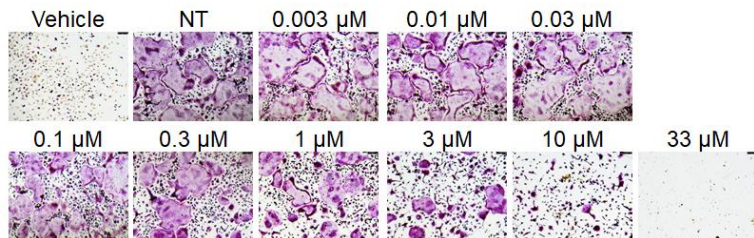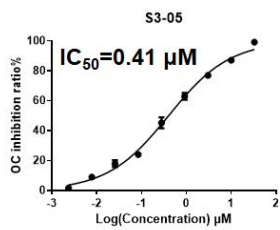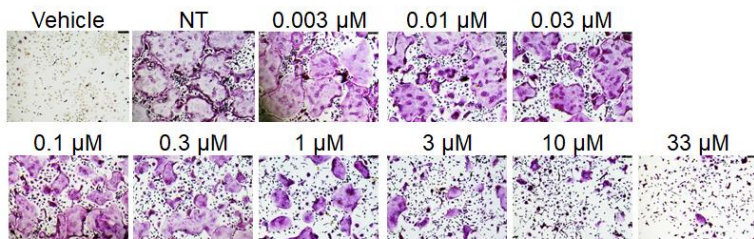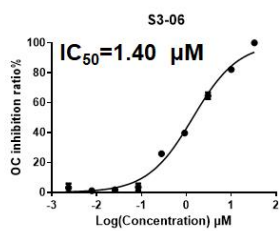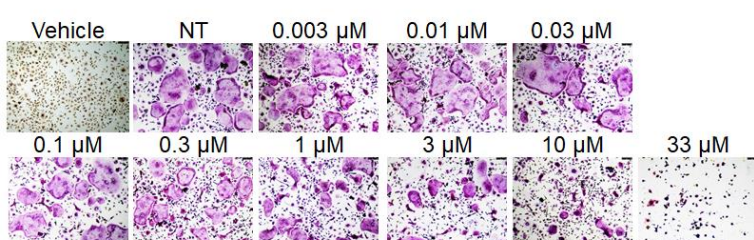

a2

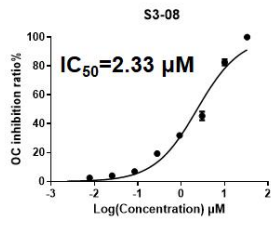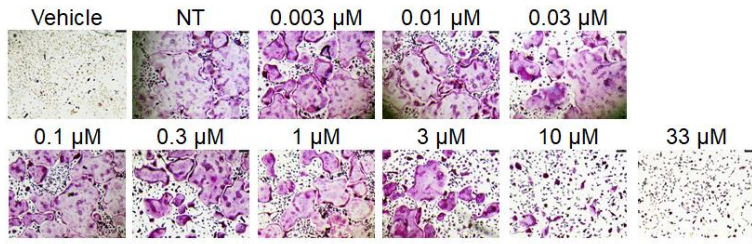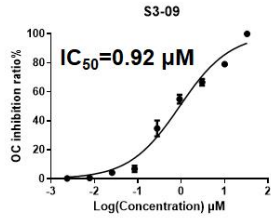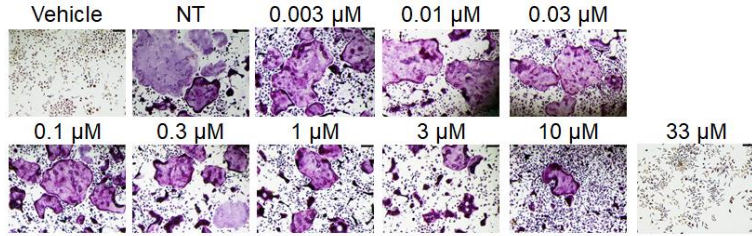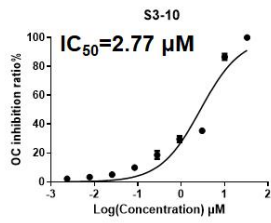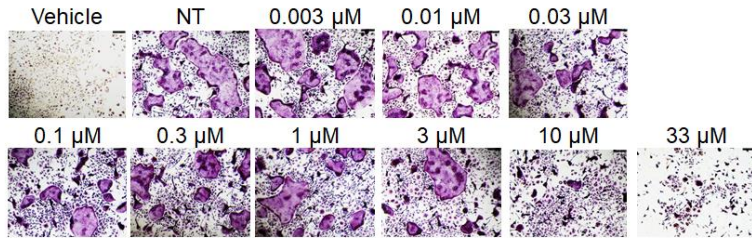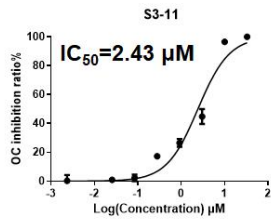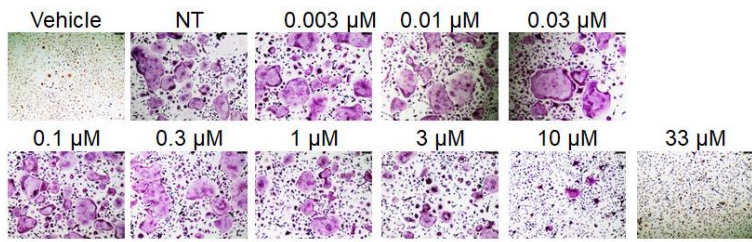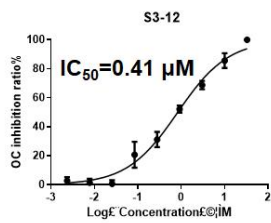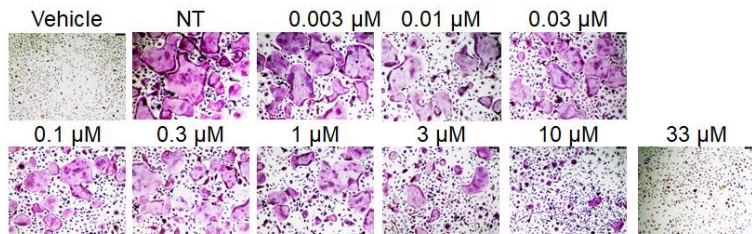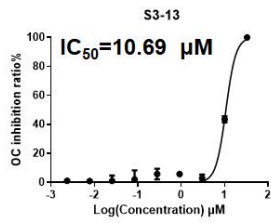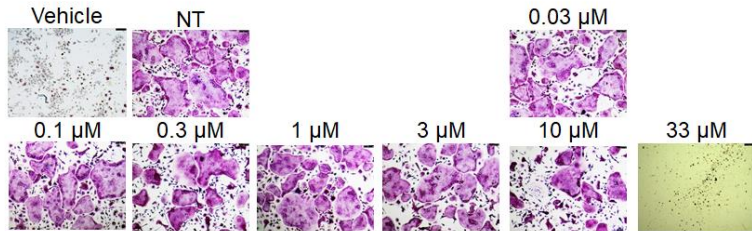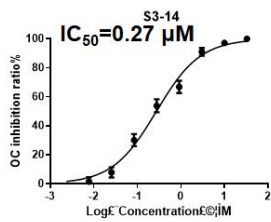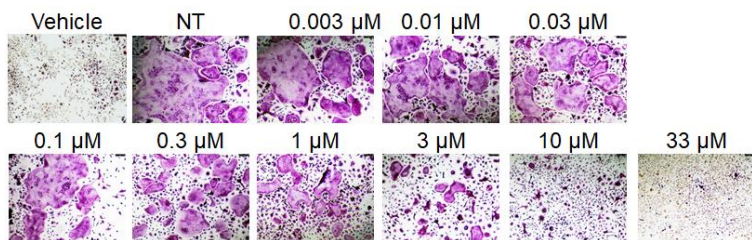

a3

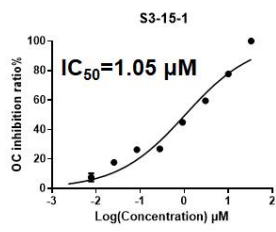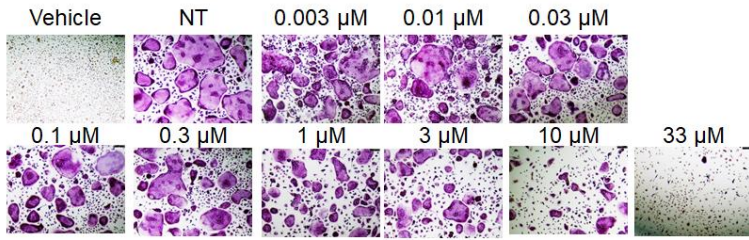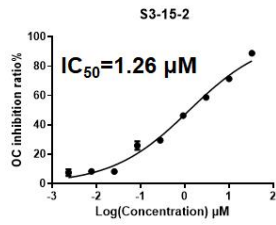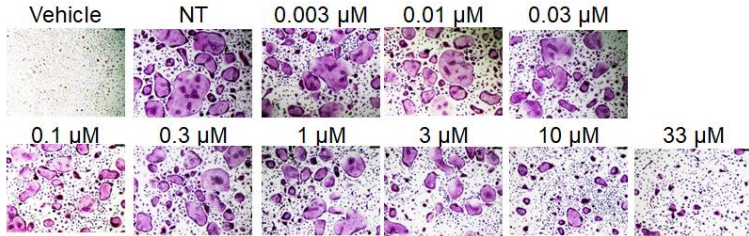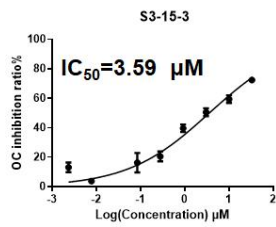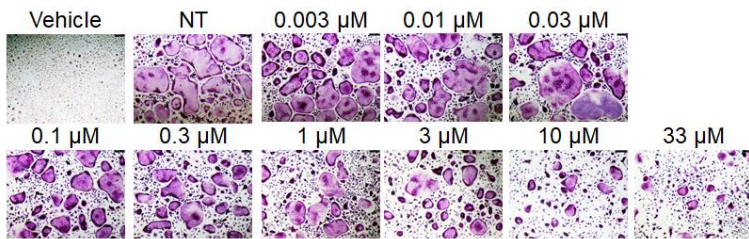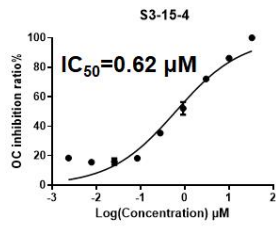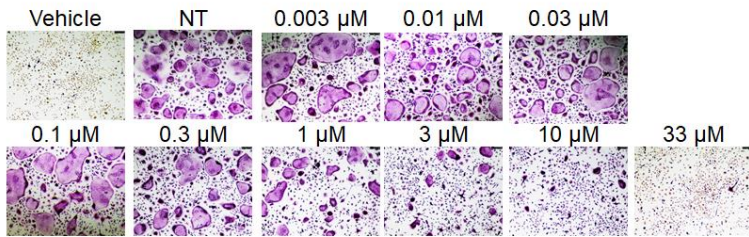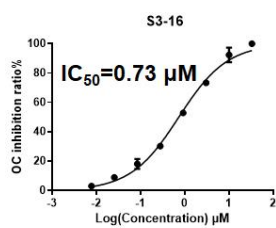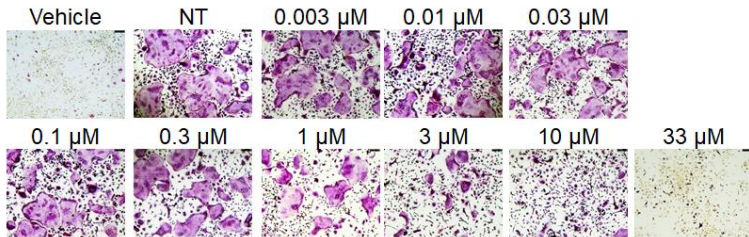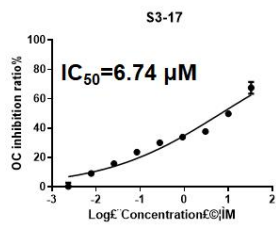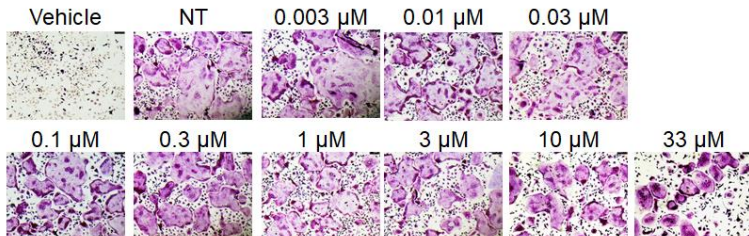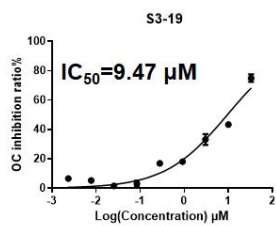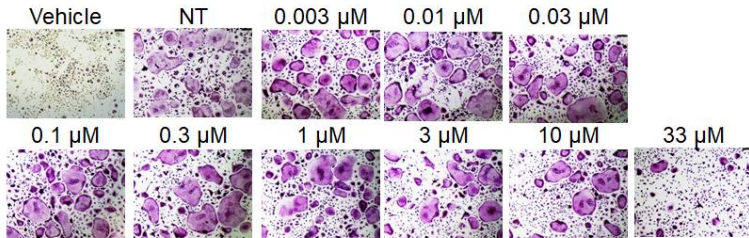

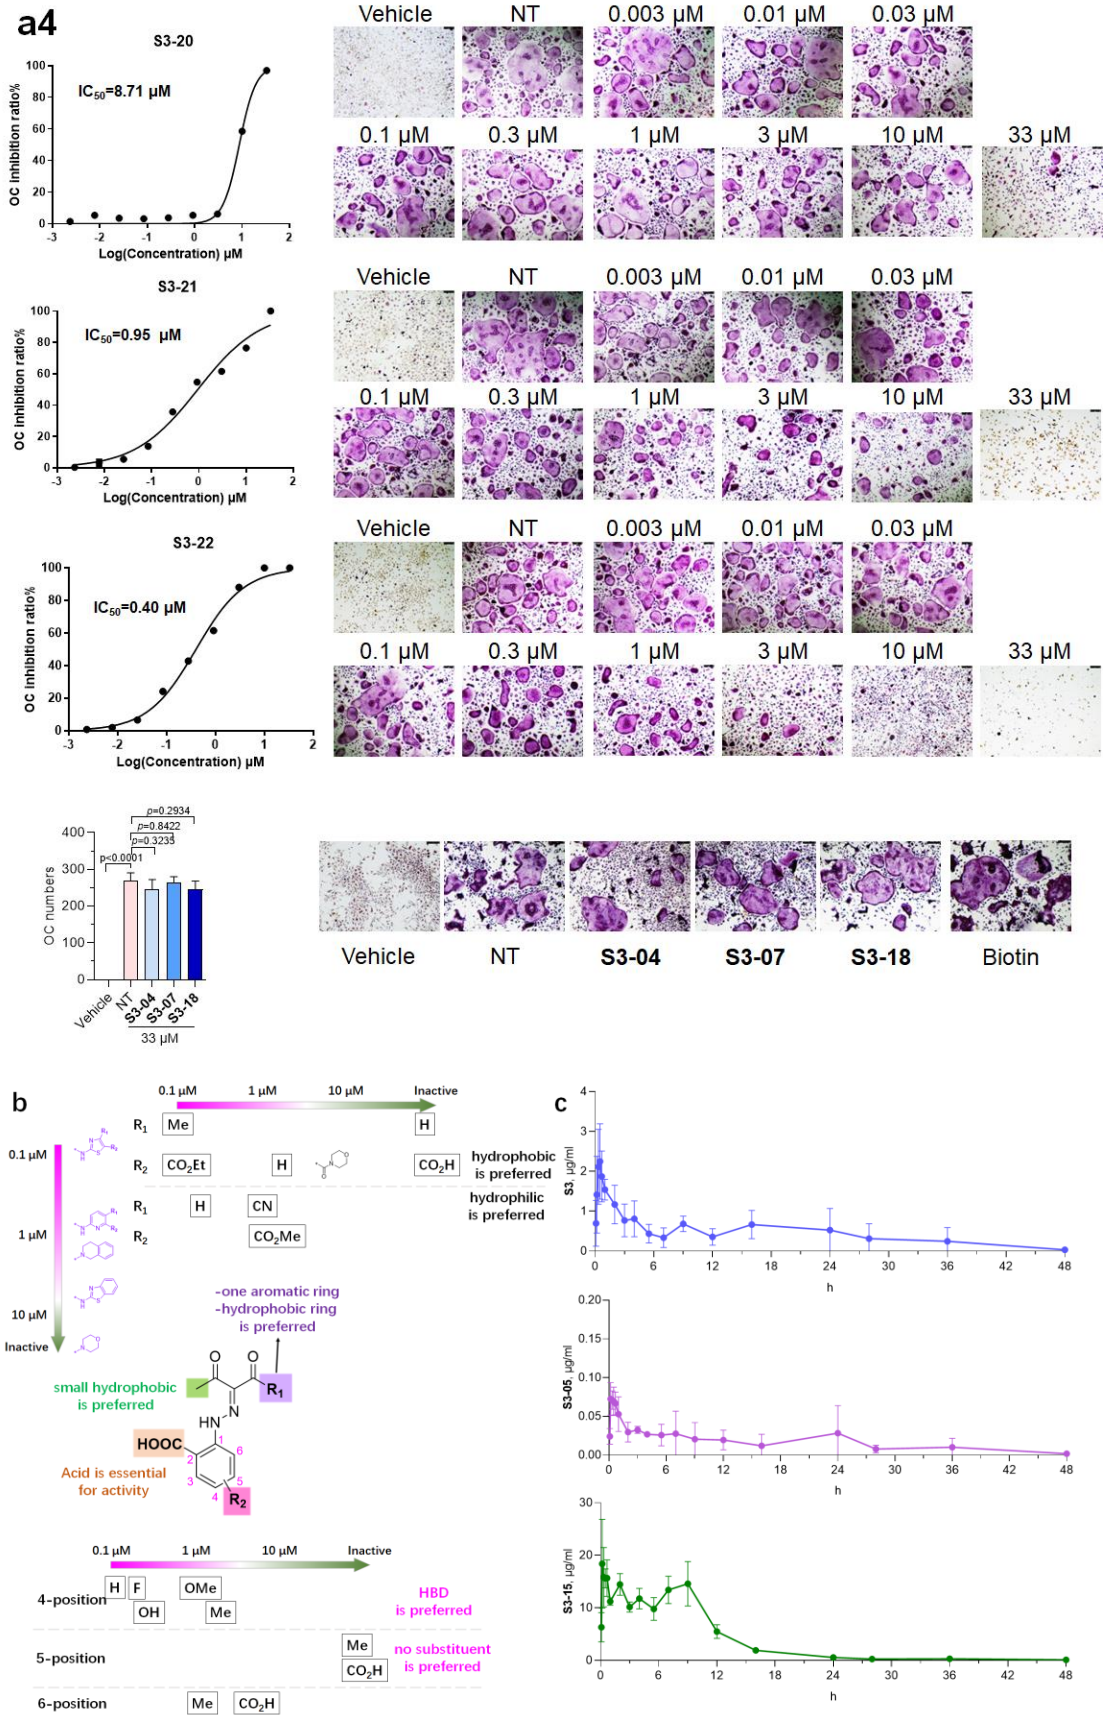

Supplementary Fig. 2. Activity, Cytotoxicity, Binding Affinity, Structure-Activity Relationship Analysis, and Pharmacokinetics Study.

**a** (1-4)  $IC_{50}$  curve and representative OC microphotographs of S3 modified active compounds. Left:  $IC_{50}$  curve of S3 modified compounds. Right: representative microphotographs of multinucleated TRAP-positive osteoclasts from each group.  $IC_{50}$  values were calculated by GraphPad Prism 8 software. **b** Summary of structure-activity relationship studies of S3 compound in osteoclast differentiation and apoptosis assays. A single aromatic ring is more suitable for R1 substitution. When isoquinoline (S3-17) and benzothiazole ring (S3-16) is applied, the activity is decreased compare to thiazole (S3, S3-08) or pyridine ring (S3-15). Moreover, the morpholine ring (S3-18) totally lost activity. Therefore, a single aromatic ring is more preferred. Increasing hydrophilicity of thiazole ring like removing Me group (S3-09) or introducing morpholine (S3-20) ring significantly decreased the activity, well the carboxylic acid group (S301) totally lost activity. Both hydrophilic group (S3-15-1) and hydrophobic group (S3-15-2) in pyridine ring affects the activity little. This data further indicated that the size of R1 substituent may be important for activity, hydrophobic or large substituent decrease the activity. For R2 substituent, a hydrogen bond donor such as OH (S3-05) or F (S3-14) at 4-position can maintain the activity. All the other groups decrease or lost activity. The carboxylic acid group at 2-position is essential for activity, changing the substituted position (S3-02 and S3-03) all affect the activity. Changing acid to OH (S3-06) or  $CH_2OH$  (S3-07) also suppress the inhibition effects. Larger substitution (S3-22 and S3-15-4) on the position of methyl group (green box) will decrease the activity. A small group seems to be preferred. **c** Pharmacokinetics of S3, s3-05, and S3-15. Male SD rats were dosed orally with S3, s3-05, and S3-15 at 10 mg/kg. Concentration in the plasma within 48 hr were detected by HPLC-MS. Compartmental pharmacokinetics parameters were assessed using WinNonlin Pharmacokinetics software. Data are presented as the mean  $\pm$  s.d.  $n=3$  for each group. Statistical difference was determined by unpaired two-tailed Student's *t* test. Significant difference *p* value is  $< 0.05$ .

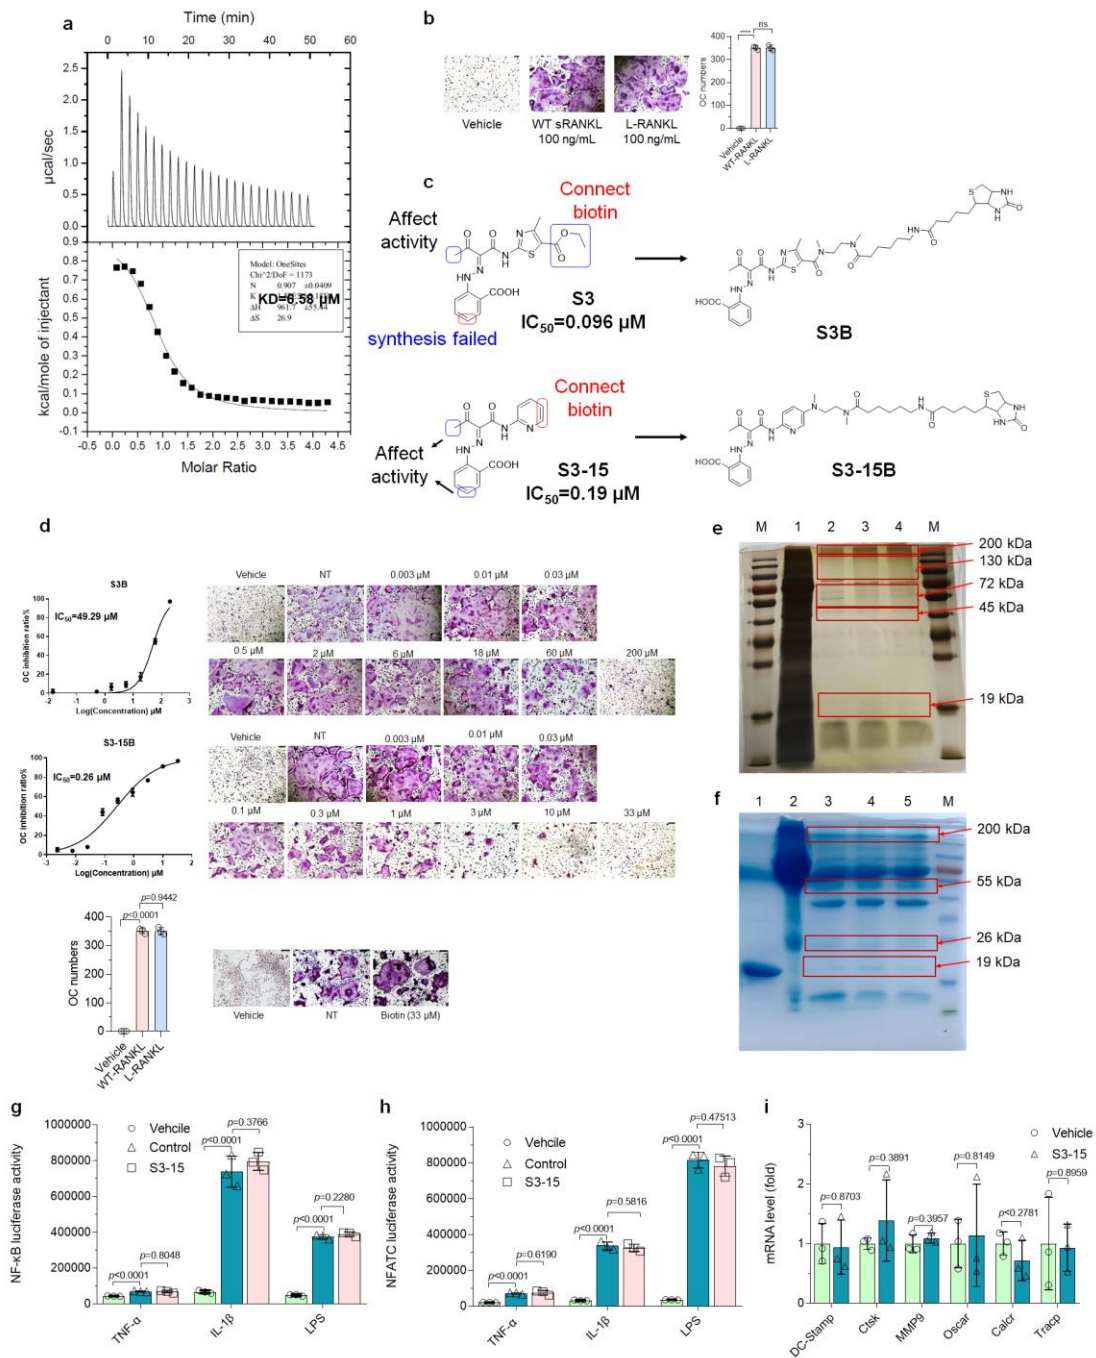

### Supplementary Fig.3. The Selectivity of Compounds.

**a** Binding affinity of compound S3-05 to sRANKL by ITC assay with KD value of 6.58 μM. **b** Osteoclastogenesis activity of L-RANKL and WT sRANKL. **c** Designed of biotin probe. The red box represents that introducing group may not affect activity. The blue box represents that introducing group will decrease activity significantly. According to the SAR study, one synthesis was success and afforded compound **S3-15B**. Considering introducing large group or hydrophilic group can decrease the activity (see also supplementary Fig. 2b), the biotin is introduced into thiazole ring of S3 which gave inactive probe **S3B**. **d** Anti-osteoclastogenesis activity of biotin and its conjugate compounds, **S3B** and **S3-15B**. Left: OC inhibition IC<sub>50</sub> curve and number of TRAP-positive multinucleated osteoclasts of biotin. Right: representative pictures of TRAP-positive multinucleated osteoclasts for each group. **e** Target enrichment of **S3B** and **S3-15B** by using ABPP assay. Rat serum was loaded onto the positive (**S3-15B**) linked, negative (**S3B**) linked and control (B) columns. Lane M, protein marker ladder; lane 1, sRANKL; lane 2, rat serum; line 3, biotin; line 4, **S3-**

**15B**; line 5, **S3B**. The bands indicated by arrowheads are differential bands that used for protein mass spectrometry analyzing. **f** Target enrichment of **S3B** and **S3-15B** by using ABPP assay. Cell lysate was loaded onto the positive (**S3-15B**) linked, negative (**S3-15B**) linked and control (B) columns. Lane M, protein marker ladder; lane 1, cell lysate; lane 2, biotin; line 3, **S3B**; line 4, **S3-15B**. The bands indicated by arrowheads are differential bands that used for protein mass spectrometry analyzing. **g-h S3-15** cannot suppress TNF- $\alpha$ , IL- $\beta$  and LPS induced NF- $\kappa$ B and NFATC activity. **i** In BMMs cells without RANKL, **S3-15** exhibited no differ with control group. Error bars represent  $\pm$  s.d. n=3 for b, d, g-i. Statistical difference was determined by unpaired two-tailed Student's t test (b and d). Statistical difference was determined by one-way ANOVA followed by Tukey's multiple comparisons test. h-i. Significant difference *p* value is < 0.05. Scale bars for b and d, 50  $\mu$ m.

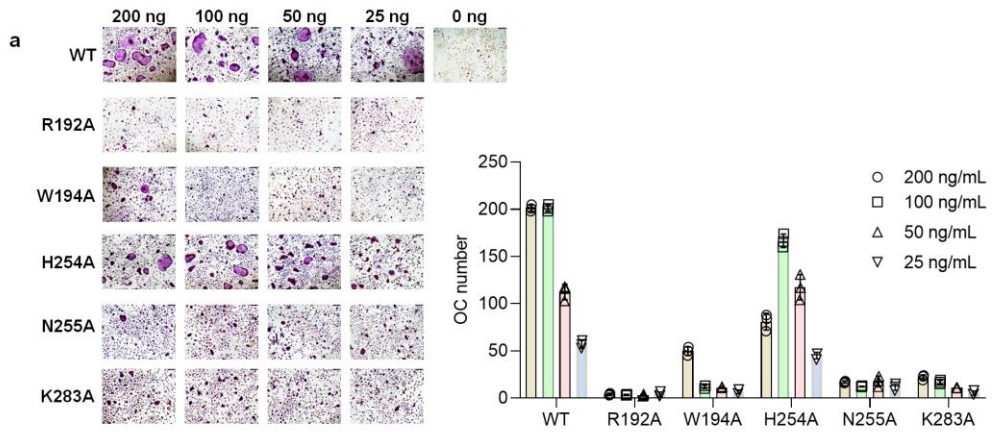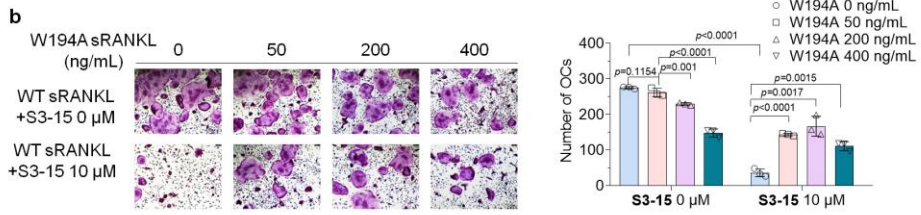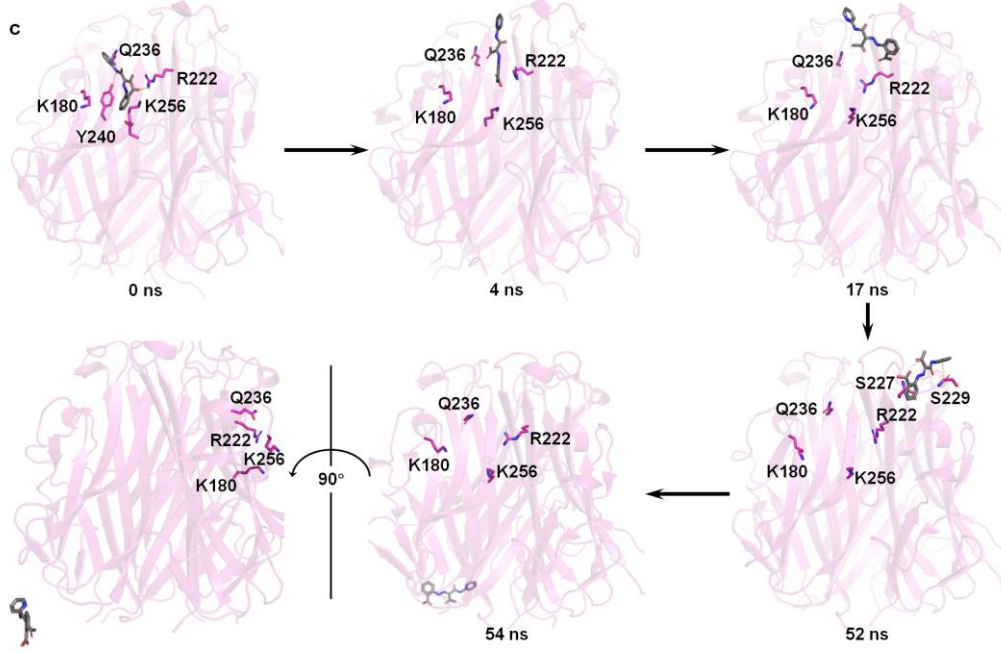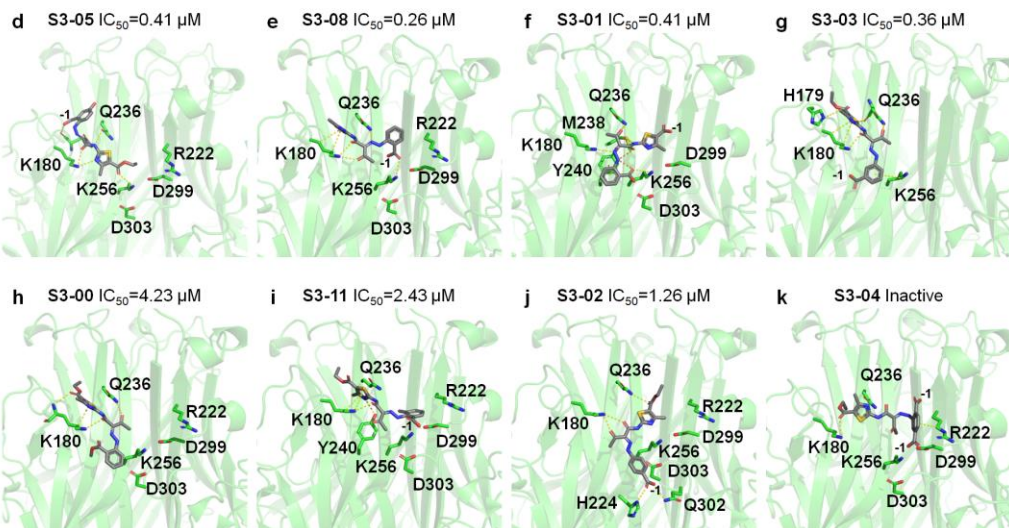



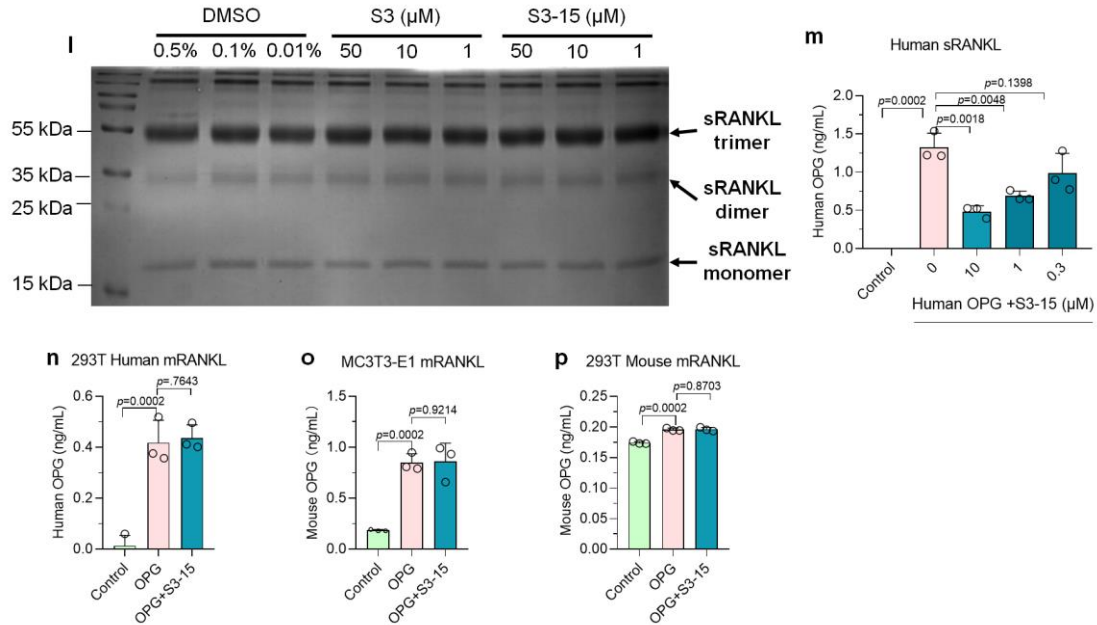

#### Supplementary Fig. 4. Binding Site Identified and S315 Binding Mode Analyzed.

**a** Representative TRAP staining images (left) of mouse BMMs cultured with different mutant sRANKL or WT sRANKL. Osteoclast numbers were counted (right).  $n = 3$  per group. Scale bars, 50  $\mu\text{m}$ . **b** In WT sRANKL-induced osteoclastogenesis system, the anti-osteoclastogenesis activity of **S3-15** is reduced when W194A sRANKL added (left, OC TRAP-stained pictures taken from one of three biological replicates. right, the OC numbers were counted in each well and presented in mean  $\pm$  s.d. Unpaired two-tailed Student's  $t$  test.  $n = 3$  per group. **c** The MD simulation process of **S3-15** with fixed-RANKL. After 4 ns MD simulation, **S3-15** moved to upside and lost all H-bonds with fixed-RANKL. Then **S3-15** kept moving upside at 17ns and 52ns. At 52ns, **S3-15** already moved to the tips of fixed-RANKL, and formed two  $p-\pi$  conjugation interactions with S229 and S231. At 54ns, **S3-15** totally lost binding with fixed-RANKL and away from it. **d-k** The binding model of **S3-05**, **S3-08**, **S3-01**, **S3-03**, **S3-00**, **S3-11**, **S3-02**, and **S3-04**. **l** Cross-link assay results that identifying whether **S3** and **S3-15** affect sRANKL trimerization. Both cannot affect sRANKL trimerization in different concentrations. **m** S3-15 influenced sRANKL binds to OPG at high concentration of 10 and 1  $\mu\text{M}$ . However, it cannot affects sRANKL and OPG binding at lower concentration of 0.3  $\mu\text{M}$ . **n** **S3-15** has no effects on human mRANKL expressed on MC3T3 cell lines and human OPG binding. **o** **S3-15** has no effects on mouse mRANKL expressed on MC3T3 cell lines and mouse OPG binding. **p** The results of pull-down assay that evaluating whether **S3-15** affects and mouse OPG binding. **S3-15** has no effects on mouse mRANKL expressed on 293T cell lines and mouse OPG binding. Error bars represent  $\pm$  s.d.  $n=3$ . Statistical difference was determined by one-way ANOVA followed by Tukey's multiple comparisons test. Significant difference  $p$  value is  $< 0.05$ .

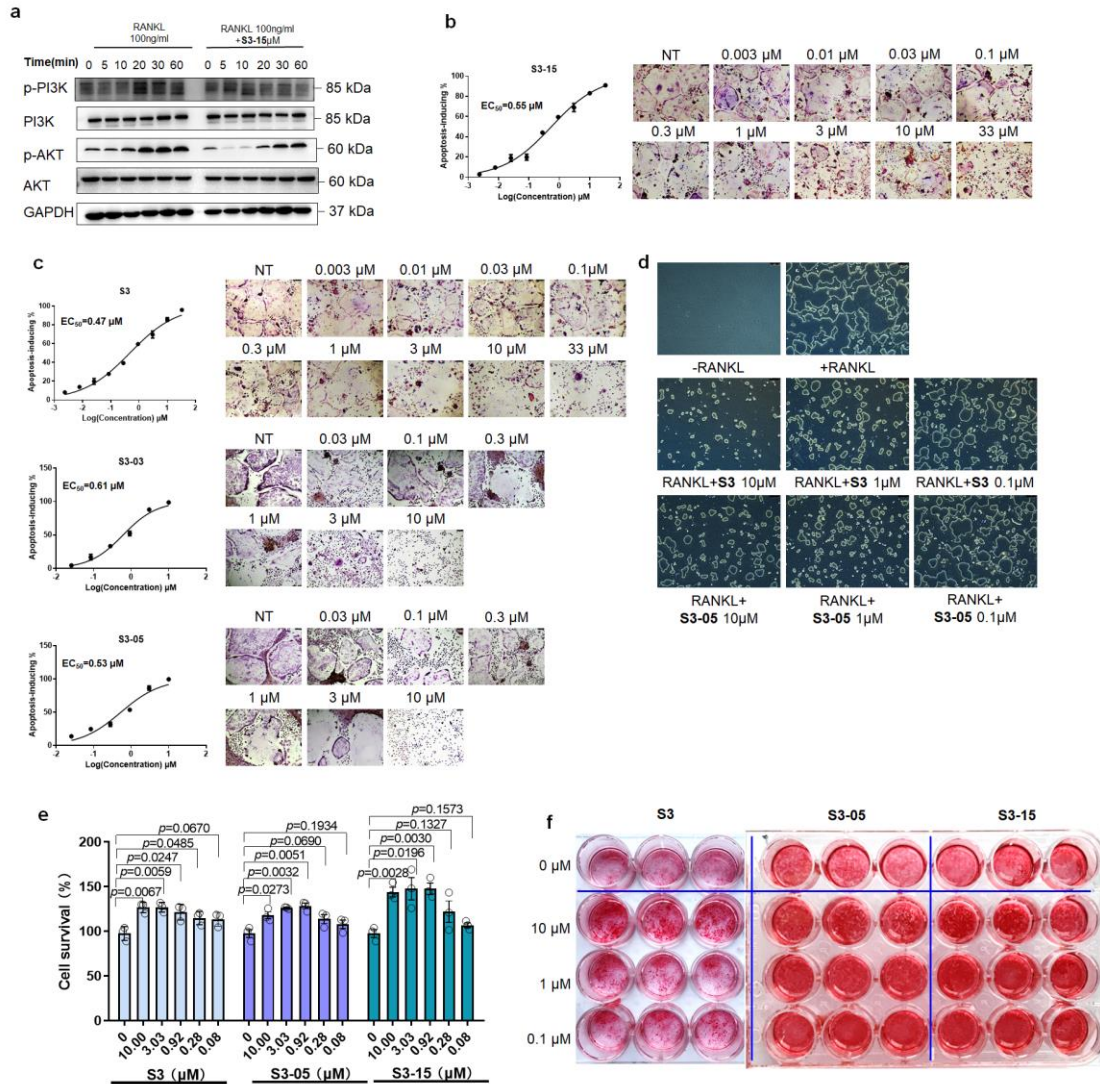

### Supplementary Fig.5. In Vitro Activity Evaluation and Signal Pathway Study of compound S3-15.

**a** Western blot of PI3K and AKT phosphorylation in RAW264.7 cells treating with or without S315 and sRANKL at different point-in-time. **b** EC<sub>50</sub> curve and representative OC microphotographs of mature osteoclasts apoptosis assay with **S3-15**. n=3 biological replicates for each concentration. EC<sub>50</sub> values were calculated by GraphPad Prism 8 software. **c** EC<sub>50</sub> curve and representative OC microphotographs of mature osteoclasts apoptosis assay with **S3**, **S3-03** and **S3-05**. n=3 biological replicates for each concentration. EC<sub>50</sub> values were calculated by GraphPad Prism 8 software. **d** Bone resorption experimental results show that **S3** and **S3-05** suppresses RANKL-induced resorption pits in dose-dependent manner (mouse BMMs). **e** Precursor osteoblasts C3H10T12 proliferation-promoting of **S3**, **S3-05** and **S3-15**. **f** Osteoblastic mineralization after treatment with **S3**, **S3-05** and **S3-15**. C3H10T12 cells were cultured in osteoblast induction differentiation medium with or without treatment for 14 days and determinate of calcium deposition in differentiated osteoblasts by Alizarin red staining. Error bars represent ± s.d. n=3. Statistical difference was determined by unpaired two-tailed Student's t test. Significant difference *p* value is < 0.05. Scale bars for b-d, 50 μm.

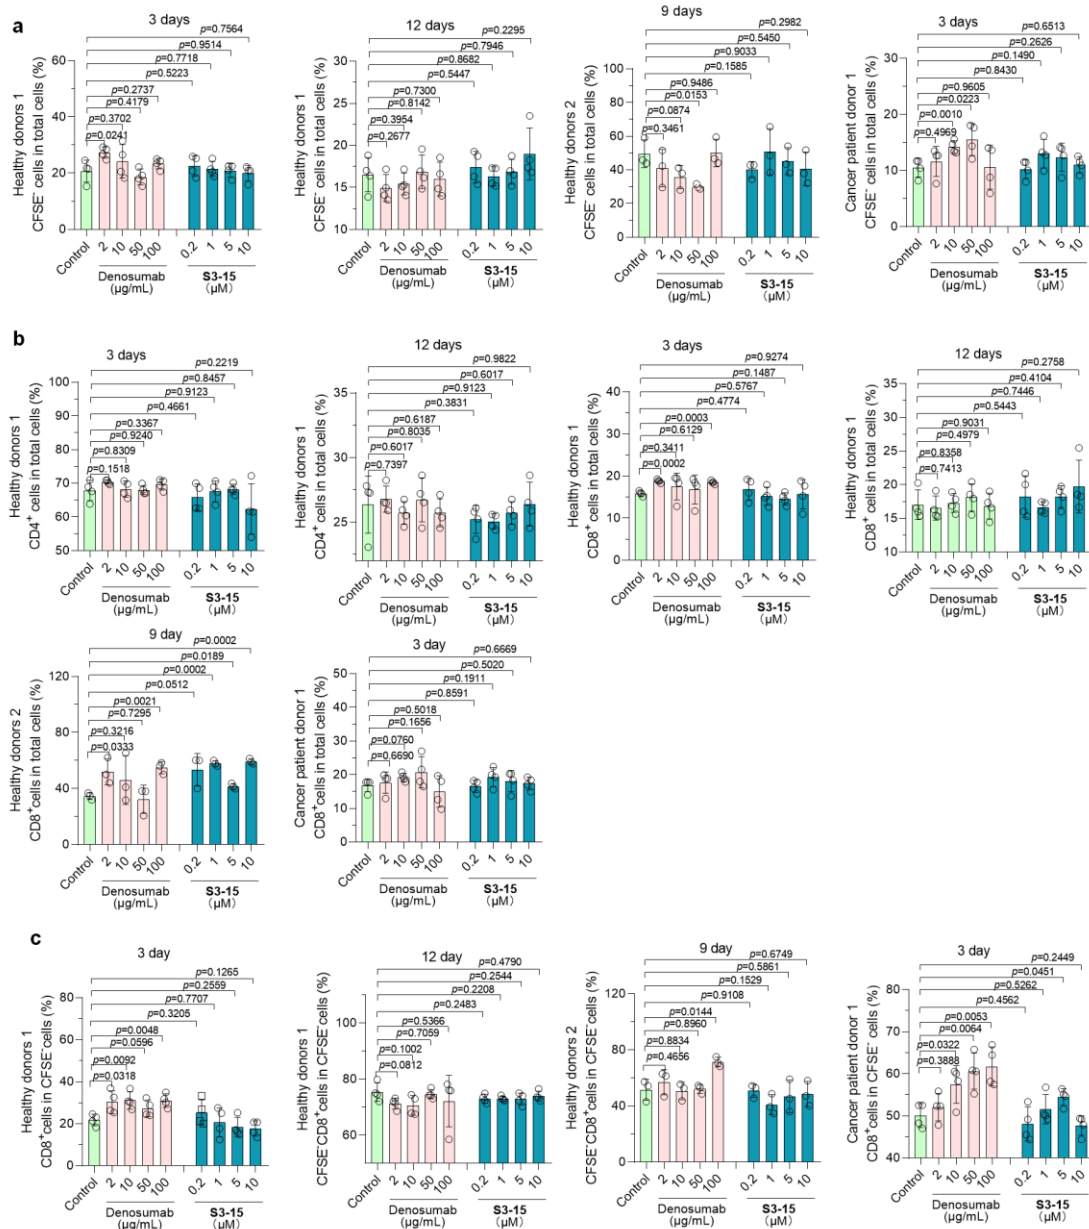

**Supplementary Fig. 6. Lymphocyte proliferation and differentiation effects of S315 and denosumab.**

**a** The effects of **S3-15** and denosumab on lymphocyte proliferation. Lymphocyte isolated from two healthy donors and one cancer patient donor were treated with **S3-15** or denosumab for 3 days, 9 days or 12 days. The ratio of CFSE-cells were detected by flow cytometry and calculated to evaluate lymphocyte proliferation. **b** The effects of **S3-15** and denosumab on T lymphocyte differentiation in total cells. After treating with **S3-15** or denosumab for 3 days, 9 days or 12 days, CD4+ T cell and CD8+ T cell were detected by flow cytometry and calculated the ratio in total cells. **c** The effects of **S3-15** and denosumab on T lymphocyte differentiation in CFSE- cells. Ratio of CD4+ T cell and CD8+ T cell in gate of CFSE- cells were analyzed after flow cytometry. Error bars represent  $\pm$  s.d. n=3 for healthy donors 2. n=4 for healthy donors 1 and cancer patient donor 1. Statistical difference was determined by unpaired two-tailed Student's t test. Significant difference p value is < 0.05.

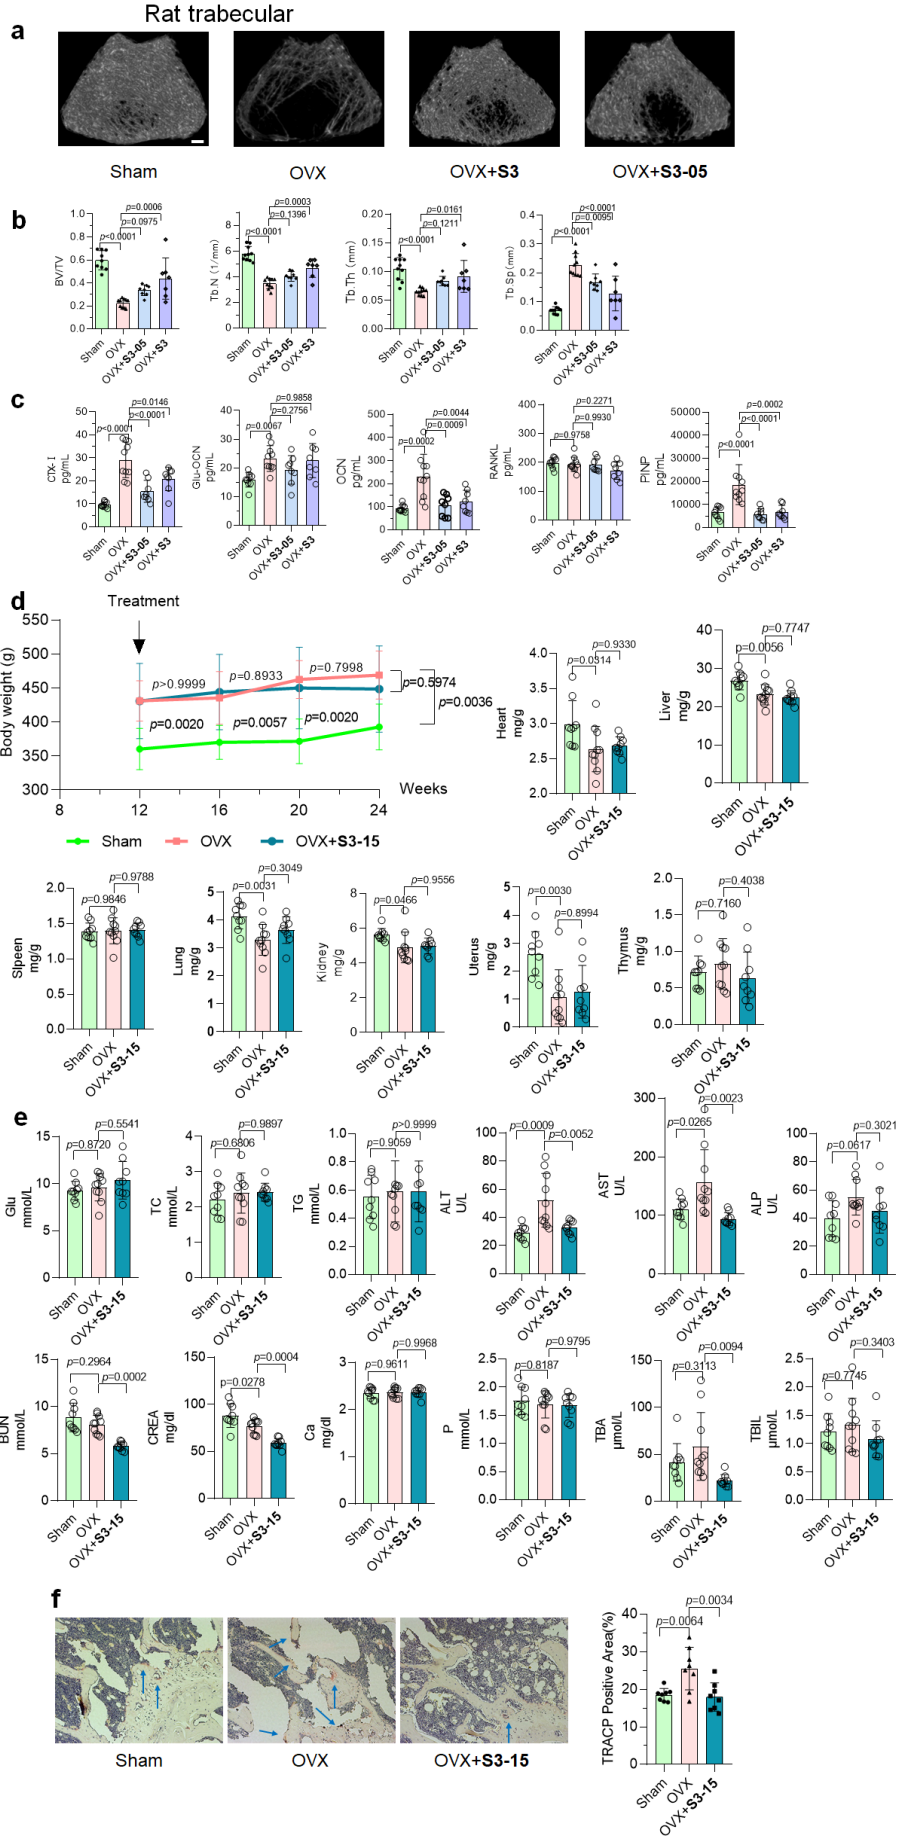

**Supplementary Fig. 7. Analysis of S3, S305, and S315 Activity, Toxicity In Vivo.**

**a** Compound **S3** and **S3-05** reduces bone loss in OVX rats. Representative  $\mu$ CT images of the trabecular of ROI in distal femur of rat sham, OVX or treated with **S3** and **S3-05**. Scalar bar, 500 $\mu$ m. **b** Compound **S3** and **S3-05** improve trabecular osteoporosis parameters in OVX rats. The value of BV/TV, Tb.Th, Tb.N in OVX rats treating with 10mg/kg/d **S3** and **S3-05** were significantly increase, while the value of Tb.Sp were significantly decrease. **c** Serum bone resorption marker CTX-I, Glu- osteocalcin, and RANKL or bone formation marker osteocalcin and PINP levels measured by ELISA. **d** In vivo toxicity evaluation of compound **S3-15**. The weight of the rats was recorded every four weeks. At the end of the treatment, heart, liver, spleen, lung, kidney, uterus, thymus was weighted and calculate their organ coefficients to examine the effects of **S3-15** on rats. **e** Serum Ca, P, AST, ALT, ALP, CREA, BUN, Glu, TC, TG, TBIL, and TBA level were also determined. **f** Histological examination of tissue sections from the femur of mice using TRAP staining. The osteoclasts were stained in red (left). Trap positive area was calculated (right). The result indicated that **S3-15** significantly inhibits osteoclast differentiation compare to OVX. The number of rats in each group is as follows: sham n=9, OVX n=10, OVX+S3-05 n=8, OVX+S3 n=7, S3-15 n=9. The number of mice is n=8 in each group. Data are expressed as the mean  $\pm$  s.d. Statistical difference was determined by one-way ANOVA followed by Tukey's multiple comparisons test. Significant difference *p* value is < 0.05.

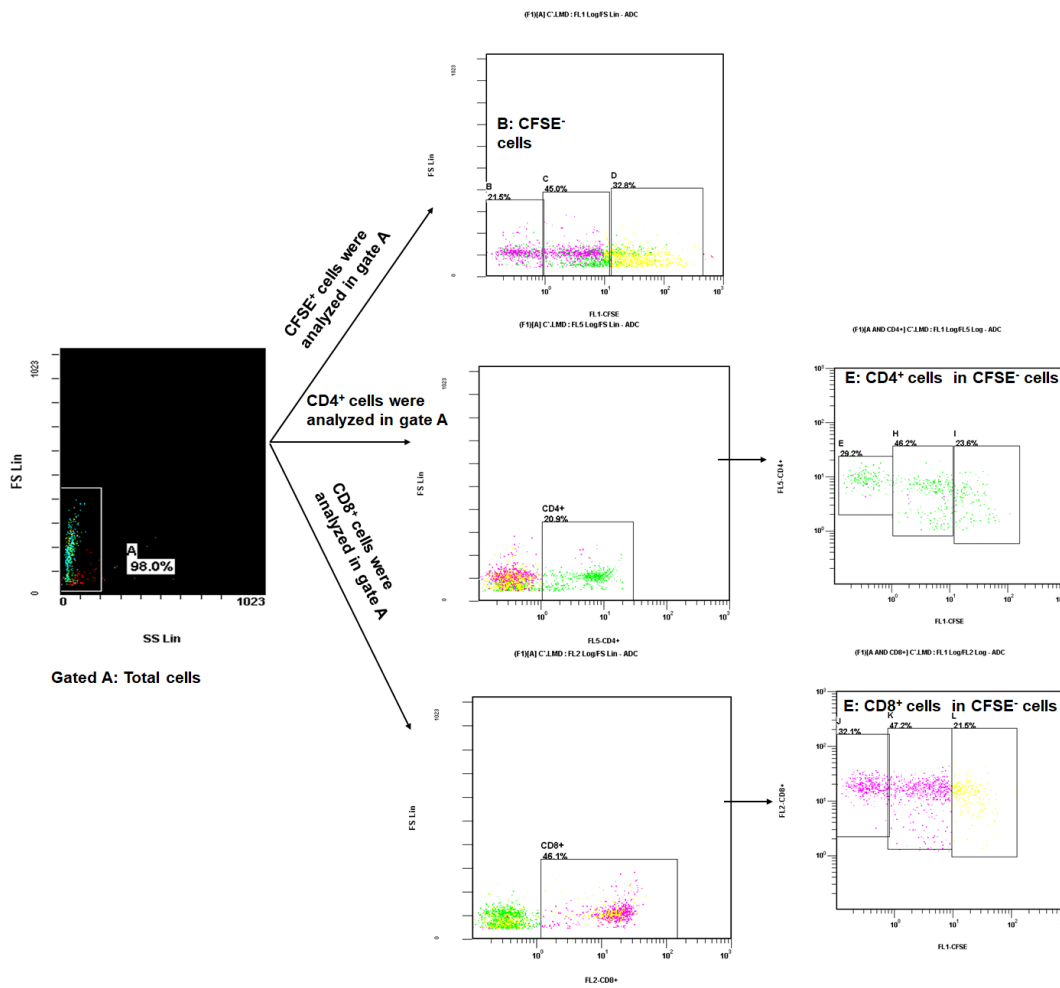

Supplementary Fig. 8. Gating Strategy for Flow Cytometric analyses of CFSE, CD4<sup>+</sup> and CD8<sup>+</sup> in human T lymphocyte cells.

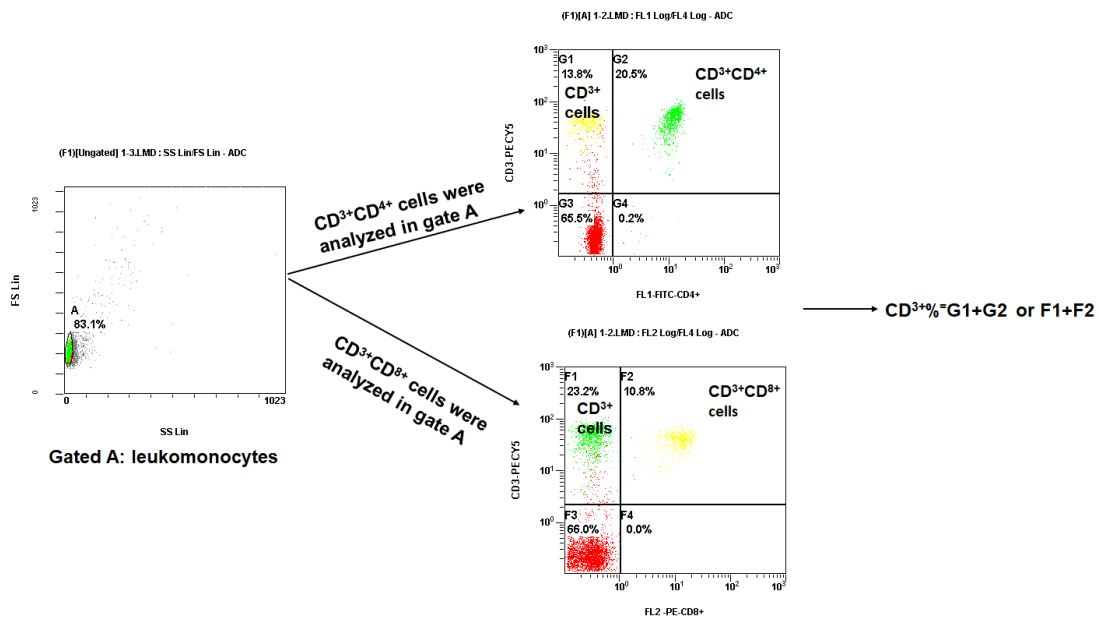

Supplementary Fig. 9. Gating Strategy for Flow Cytometric analyses of CD3<sup>+</sup>, CD3<sup>+</sup>CD4<sup>+</sup> and CD3<sup>+</sup>CD8<sup>+</sup> in mouse peripheral blood.

## KEY RESOURCES TABLE

| REAGENT or RESOURCE                                                               | SOURCE                    | IDENTIFIER                      |
|-----------------------------------------------------------------------------------|---------------------------|---------------------------------|
| <b>Antibodies</b>                                                                 |                           |                                 |
| Rabbit monoclonal anti-Phospho-NF- $\kappa$ B p65 (Ser536) antibody               | Cell Signaling Technology | Cat# 3033; RRID: AB_331284      |
| Rabbit monoclonal anti-NF- $\kappa$ B p65 NF- $\kappa$ B p65 antibody             | Cell Signaling Technology | Cat# 8242; RRID: AB_10859369    |
| Rabbit monoclonal anti-Phospho-p44/42 MAPK (Erk1/2) (Thr202/Tyr204) antibody      | Cell Signaling Technology | Cat# 4370; RRID: AB_2315112     |
| Rabbit monoclonal anti-p44/42 MAPK (Erk1/2) antibody                              | Cell Signaling Technology | Cat# 4695; RRID: AB_390779      |
| Rabbit monoclonal anti-Phospho-I $\kappa$ B $\alpha$ (Ser32) (14D4) antibody      | Cell Signaling Technology | Cat# 2859; RRID: AB_561111      |
| Rabbit monoclonal anti- I $\kappa$ B $\alpha$ antibody                            | Cell Signaling Technology | Cat# 4812; RRID: AB_10694416    |
| Rabbit monoclonal anti-Phospho-SAPK/JNK antibody (Thr183/Tyr185) (81E11) antibody | Cell Signaling Technology | Cat# 4668; RRID: AB_823588      |
| Rabbit monoclonal anti-SAPK/JNK antibody                                          | Cell Signaling Technology | Cat# 9252; RRID: AB_2250373     |
| Rabbit monoclonal anti-Phospho-Akt (Ser473) antibody                              | Cell Signaling Technology | Cat# 9271; RRID: AB_329825      |
| Rabbit monoclonal-anti-pan-AKT antibody                                           | Abcam                     | Cat# ab8805; RRID: AB_306791    |
| Rabbit monoclonal anti-PI 3 Kinase p85 alpha (phospho Y607) antibody              | Abcam                     | Cat# ab182651; RRID: AB_2756407 |
| Rabbit monoclonal anti-PI 3 Kinase p85 alpha antibody                             | Abcam                     | Cat# ab191606                   |
| Rabbit monoclonal anti-beta actin antibody                                        | Abcam                     | Cat# ab8226; RRID: AB_306371    |
| <b>Bacterial</b>                                                                  |                           |                                 |
| <i>Escherichia coli</i> DH5 alpha cells                                           | This study                | N/A                             |
| <i>Escherichia coli</i> BL21 (DE3) cells                                          | This study                | N/A                             |
| <b>Chemicals and Recombinant Proteins</b>                                         |                           |                                 |
| Fetal Bovine Serum (Mammalian cell culture)                                       | Bovogen                   | Cat# 1803A                      |
| Penicillin-Streptomycin (Mammalian Cell Culture)                                  | Gibco                     | Cat# 15140122                   |
| MEM-alpha basic (Medium for mammalian cell culture)                               | Gibco                     | Cat# C12641800BT                |
| DMEM (Medium for mammalian cell culture)                                          | Gibco                     | Cat# C11965500BT                |
| Murine M-CSF                                                                      | Peprtech                  | Cat# 315-02                     |
| In Vivo Ready anti-Human CD28 (CD28.2)                                            | Tonbo Biosciences         | Cat# 40-0289-U500               |
| In Vivo Ready anti-Human CD3 (OKT3)                                               | Tonbo Biosciences         | Cat# 40-0037-U500               |
| Human IL-2                                                                        | Peprtech                  | Cat# 200-02                     |
| GST-RANKL                                                                         | This study                | N/A                             |
| RANKL                                                                             | This study                | N/A                             |
| L-RANKL                                                                           | This study                | N/A                             |
| RANK                                                                              | This study                | N/A                             |

|                                                                                                                 |                                            |                                |
|-----------------------------------------------------------------------------------------------------------------|--------------------------------------------|--------------------------------|
| Biotin                                                                                                          | Energy chemical                            | Cat# E080117; CAS: 58-85-5     |
| Human osteoprotegerin, Fc tag                                                                                   | Acrobiosytems                              | Cat# TNB-H5259-100 µg          |
| Mouse osteoprotegerin, Fc tag                                                                                   | SinoBiological                             | Cat# 52613-M02H                |
| <b>S3</b>                                                                                                       | SPEC                                       | XOS00045                       |
| <b>Critical Commercial Assays</b>                                                                               |                                            |                                |
| Acid Phosphatase, Leukocyte (TRAP) Kit                                                                          | Sigma                                      | Cat# 387A                      |
| RevertAid™ First Strand cDNA Synthesis Kit                                                                      | Thermo Fisher                              | Cat# K1622                     |
| Maxima SYBR Green/Fluorescein qPCR Master Mix (2X)                                                              | Thermo Fisher                              | Cat# K0241                     |
| Annexin V-FITC Apoptosis Detection Kit                                                                          | Bevotime                                   | Cat# C1062L                    |
| T4 ligase                                                                                                       | Merck                                      | 69839                          |
| PCR reaction Kit                                                                                                | TOYOBO                                     | QPK-201                        |
| Plasmid Midiprep Kit                                                                                            | QIAGEN                                     | 12145                          |
| PE-Cyanine7 anti-Human CD8a (RPA-T8)                                                                            | Tonbo Biosciences                          | Cat# 60-0088-T100              |
| PE anti-Human CD4 (RPA-T4)                                                                                      | Tonbo Biosciences                          | Cat# 50-0049-T100              |
| PerCP-Cyanine5.5 anti-Human CD3 (OKT3)                                                                          | Tonbo Biosciences                          | Cat# 65-0037-T100              |
| ELISA Kit for Human Osteoprotegerin                                                                             | Wuhan USCN Business                        | Cat# SEA108Hu                  |
| ELISA Kit for Mouse Osteoprotegerin                                                                             | Wuhan USCN Business                        | Cat# SEA108Mu                  |
| <b>REAGENT or RESOURCE</b>                                                                                      |                                            |                                |
| Ni-NTA agarose resin                                                                                            | QIAGEN                                     | 30210                          |
| Glutathione Agarose Resin                                                                                       | Merck                                      | G4510                          |
| Streptavidin–Agarose from Streptomyces avidinii                                                                 | Sigma                                      | Cat# S1638                     |
| Carboxyfluorescein succinimidyl amino ester (CFSE)                                                              | Tonbo Biosciences                          | Cat# 13-0850-U500              |
| Chemical characterizations                                                                                      | This study                                 | N/A                            |
| <b>Experimental Models: Cell Lines</b>                                                                          |                                            |                                |
| Mouse: RAW264.7 cells                                                                                           | ATCC                                       | Cat# TIB-71, RRID: CVCL_0493   |
| Mouse: RAW264.7 cells stably transfected with an NF-κB-driven luciferase reporter gene construct (3kB-Luc-SV40) | JiaKe Xu Lab                               | N/A                            |
| Mouse: RAW264.7 cells stably transfected with an NFATc1 luciferase reporter construct                           | JiaKe Xu Lab                               | N/A                            |
| Human: HEK293T                                                                                                  | ATCC                                       | Cat# CRL-3216, RRID: CVCL_0063 |
| BMMs                                                                                                            | This study                                 | N/A                            |
| <b>Experimental Models: Organisms/Strains</b>                                                                   |                                            |                                |
| C57BL/6 (Female)                                                                                                | Guangdong Medical Laboratory Animal Center | N/A                            |
| Sprague Dawley rat (SD, Female)                                                                                 | Guangdong Medical Laboratory Animal Center | N/A                            |
| <b>Oligonucleotides</b>                                                                                         |                                            |                                |
| DC-stamp F:5'-GGGGACTTATGTGTTCCACG-3'                                                                           | Sangon Biotech                             | N/A                            |
| DC-stamp R:5'-ACAAAGCAACAGACTCCCAAAT-3'                                                                         | Sangon Biotech                             | N/A                            |
| Calcr F: 5'-TGCAGACAACTCTGGTTGG-3'                                                                              | Sangon Biotech                             | N/A                            |
| Calcr R:5'-TCGGTTTCTTCTCCTGGA-3'                                                                                | Sangon Biotech                             | N/A                            |



|                                      |                |     |
|--------------------------------------|----------------|-----|
| Oscar F: 5'-CTCTTCAAAGTGGCCTTGCA-3'  | Sangon Biotech | N/A |
| Oscar R: 5'-GGAAGAACTCAGCCAGCTCAA-3' | Sangon Biotech | N/A |
| Tracp F: 5'-GGCTATGTGCTGAG-3'        | Sangon Biotech | N/A |
| Tracp R: 5'-GGAGGCTGGTCTTA-3'        | Sangon Biotech | N/A |
| β-actin F: TCCAGCCTTCCTTCTGGGTAT     | Sangon Biotech | N/A |
| β-actin R: TGTTGGCATAGAGGTCTTTACGG   | Sangon Biotech | N/A |
| Ctsk F: CAGCAGAACGGAGGCATTGA         | Sangon Biotech | N/A |
| Ctsk R: CCTTGCCGTGGCGTTATAC          | Sangon Biotech | N/A |
| MMP9 F: CCTACTCTGCCTGCACCACTAAA      | Sangon Biotech | N/A |
| MMP9 R: CTGCTTGCCAGGAAGACGAA         | Sangon Biotech | N/A |

---

#### Software and Algorithms

---

|                              |                              |      |
|------------------------------|------------------------------|------|
| MOE 2018                     | Chemical Computing Group ULC | N/A  |
| Pymol 2.3.4                  | Schrödinger                  | N/A  |
| ChemBioOffice 2014           | CambridgeSoft                | N/A  |
| Schrödinger 2018-1           | Schrödinger                  | N/A  |
| Amber 16                     | AMBER Software Administrator | N/A  |
| GraphPad Prism 8             | GraphPad Software            | N/A  |
| ImageJ                       | NIH                          | N/A  |
| ProteOn XPR36 ProteonManager | Bio-Rad                      | N/Ac |

---

### The sequences of sRANKL and mRANKL mimics

The amino acid sequence of sRANKL was the C-terminal extracellular region of RANKL (rat 159-318 aa). The amino acid sequence of mRANKL was two sRANKL monomers linked by -Gly-Ser-Gly-Ser-. (1) sRANKL (rat 159-318 aa)

GKPEAQPF AHLTINAANIPSGSHK VLSWYH DRGWAKISNM TSLNGKLRVNQDGFYYLYANICFRHHETSGS  
VPADYLQ L M V Y V V K T S I K I P S S H N L M K G G S T K N W S G N S E F H F Y S I N V G G F F K L R A G E E I S V Q V S N P S L L D P D Q D  
ATYFGAFKVQDID

(2) GST-sRANKL (rat 159-318 aa)

GKPEAQPF AHLTINAANIPSGSHK VLSWYH DRGWAKISNM TSLNGKLRVNQDGFYYLYANICFRHHETSGS  
VPADYLQ L M V Y V V K T S I K I P S S H N L M K G G S T K N W S G N S E F H F Y S I N V G G F F K L R A G E E I S V Q V S N P S L L D P D Q D  
ATYFGAFKVQDID

(3) mRANKL (sRANKL-GSGS-sRANKL, rat 159-318 aa)

GKPEAQPF AHLTINAANIPSGSHK VLSWYH DRGWAKISNM TSLNGKLRVNQDGFYYLYANICFRHHETSGS  
VPADYLQ L M V Y V V K T S I K I P S S H N L M K G G S T K N W S G N S E F H F Y S I N V G G F F K L R A G E E I S V Q V S N P S L L D P D Q D  
ATYFGAFKVQDIDGSGSGKPEAQPF AHLTINAANIPSGSHK VLSWYH DRGWAKISNM TSLNGKLRVNQDGF  
YYLYANICFRHHETSGSVPADYLQ L M V Y V V K T S I K I P S S H N L M K G G S T K N W S G N S E F H F Y S I N V G G F F K L R A G  
E E I S V Q V S N P S L L D P D Q D A T Y F G A F K V Q D I D

### Compounds synthesis

#### (E)-2-(2-(1-((5-(ethoxycarbonyl)-4-methylthiazol-2-yl) amino)-1,3-dioxobutan-2-ylidene) hydrazinyl) benzoic acid: S3

S3 was synthesized according to the general procedure as yellow solid with 58% yield.

$^1\text{H}$  NMR (500 MHz,  $\text{DMSO-}d_6$ )  $\delta$  12.84 (bs, 1H), 7.98 (d,  $J = 10.0$  Hz, 1H), 7.80 (d,  $J = 10.0$  Hz, 1H), 7.46 (t,  $J = 10.0$  Hz, 1H), 7.16 (t,  $J = 10.0$  Hz, 1H), 4.26 (q,  $J = 5.0$  Hz, 2H), 2.56 (s, 3H), 2.54 (s, 3H), 1.32 (t,  $J = 5.0$  Hz, 3H).

$^{13}\text{C}$  NMR (126 MHz,  $\text{DMSO-}d_6$ )  $\delta$  162.56, 157.01, 131.90, 131.42, 114.51, 60.97, 26.45, 17.44, 14.70.

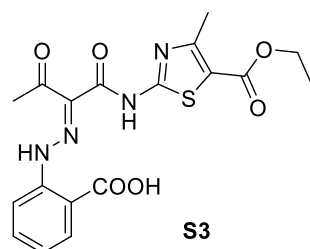

**Ethyl (E)-2-(2-(2-(2-(methoxycarbonyl)phenyl)hydrazono)-3-oxobutanamido)-4-methylthiazole-5-carboxylate: S3-00**

**S3-00** was synthesized according to the general procedure as yellow solid with 45% yield.

$^1\text{H}$  NMR (400 MHz,  $\text{CDCl}_3$ )  $\delta$  15.35 (s, 1H), 12.50 (s, 1H), 8.04 (d,  $J = 8.0$  Hz, 1H), 7.89 (d,  $J = 8.0$  Hz, 1H), 7.56 (t,  $J = 8.0$  Hz, 1H), 7.18 (t,  $J = 8.0$  Hz, 1H), 4.26 (q,  $J = 4.0$  Hz, 2H), 4.03 (s, 3H), 2.60 (s, 3H), 2.56 (s, 3H), 1.31 (t,  $J = 4.0$  Hz, 3H).

$^{13}\text{C}$  NMR (100 MHz,  $\text{CDCl}_3$ )  $\delta$  198.17, 165.68, 161.82, 159.37, 156.78, 156.00, 142.11, 133.45, 130.70, 125.01, 123.72, 115.69, 115.52, 114.82, 59.83, 51.83, 25.18, 16.29, 13.40.

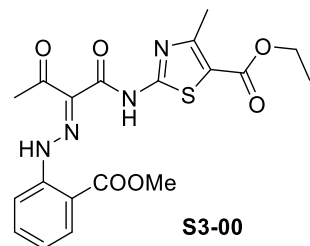

**(E)-2-(2-(2-(2-(2-carboxyphenyl)hydrazono)-3-oxobutanamido)-4-methylthiazole-5-carboxylic acid: S3-01**

**S3-01** was synthesized according to the general procedure as yellow solid with 92% yield.

$^1\text{H}$  NMR (500 MHz,  $\text{DMSO-}d_6$ )  $\delta$  15.06 (d,  $J = 20.0$  Hz, 1H), 12.50 (d,  $J = 15.0$  Hz, 1H), 8.02-7.96 (m, 2H), 7.73 (d,  $J = 10.0$  Hz, 1H), 7.30 (t,  $J = 10.0$  Hz, 1H), 3.80 (s, 3H), 2.50 (s, 3H).

$^{13}\text{C}$  NMR (126 MHz,  $\text{DMSO-}d_6$ )  $\delta$  168.52, 162.73, 143.49, 135.08, 131.84, 125.04, 117.04, 115.96, 52.44, 26.42, 17.38.

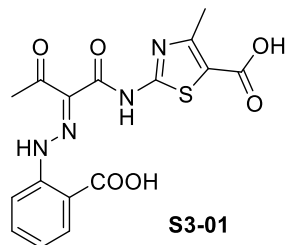

**(E)-4-(2-(1-((5-(ethoxycarbonyl)-4-methylthiazol-2-yl)amino)-1,3-dioxobutan-2-ylidene)hydrazinyl)benzoic acid: S3-02**

**S3-02** was synthesized according to the general procedure as yellow solid with 58% yield.

$^1\text{H}$  NMR (500 MHz,  $\text{DMSO-}d_6$ )  $\delta$  12.95 (bs, 1H), 7.98 (d,  $J = 10.0$  Hz, 2H), 7.61 (d,  $J = 10.0$  Hz, 2H), 4.26 (q,  $J = 5.0$  Hz, 2H), 2.57 (s, 3H), 2.51 (s, 3H), 1.30 (t,  $J = 5.0$  Hz, 3H).

$^{13}\text{C}$  NMR (126 MHz,  $\text{DMSO-}d_6$ )  $\delta$  167.34, 162.53, 131.45, 116.05, 60.97, 17.50, 14.67.

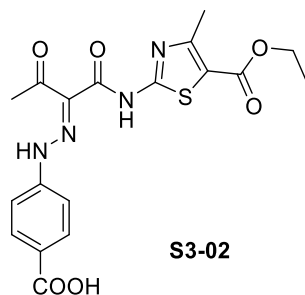

**(E)-3-(2-(1-((5-(ethoxycarbonyl)-4-methylthiazol-2-yl)amino)-1,3-dioxobutan-2-ylidene)hydrazinyl)benzoic acid: S3-03**

**S3-03** was synthesized according to the general procedure as yellow solid with 62% yield.

$^1\text{H}$  NMR (400 MHz,  $\text{DMSO-}d_6$ )  $\delta$  8.22 (s, 1H), 7.94 (d,  $J = 8.0$  Hz, 1H), 7.83 (d,  $J = 8.0$  Hz, 1H), 7.43 (t,  $J = 8.0$  Hz, 1H), 4.33 (q,  $J = 4.0$  Hz, 2H), 2.65 (s, 3H), 2.60 (s, 3H), 1.37 (t,  $J = 4.0$  Hz, 3H).

$^{13}\text{C}$  NMR (100 MHz,  $\text{DMSO-}d_6$ )  $\delta$  198.55, 167.22, 162.30, 161.14, 157.91, 142.65, 132.64, 130.36, 127.41, 126.28, 120.94, 117.33, 115.67, 61.18, 26.05, 17.41, 14.61.

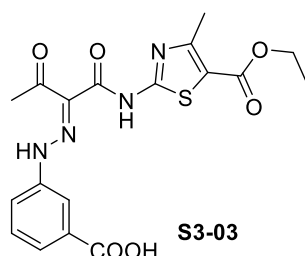

**(E)-2-(2-(1-((5-(ethoxycarbonyl)-4-methylthiazol-2-yl)amino)-1,3-dioxobutan-2-ylidene)hydrazinyl)terephthalic acid: S3-04**

**S3-04** was synthesized according to the general procedure as yellow solid with 40% yield.

$^1\text{H}$  NMR (400 MHz,  $\text{DMSO-}d_6$ )  $\delta$  12.69 (bs, 1H), 8.36 (s, 1H), 8.06 (d,  $J = 8.0$  Hz, 1H), 7.69 (dd,  $J = 8.0$  Hz and 4.0 Hz, 1H), 4.24 (q,  $J = 4.0$  Hz, 2H), 2.56 (s, 3H), 2.55 (s, 3H), 1.30 (t,  $J = 4.0$  Hz, 3H).

$^{13}\text{C}$  NMR (100 MHz,  $\text{DMSO-}d_6$ )  $\delta$  199.00, 168.05, 167.42, 162.44, 159.72, 158.45, 156.95, 144.51, 132.21, 128.90, 126.43, 124.79, 115.62, 61.03, 26.21, 17.40, 14.65.

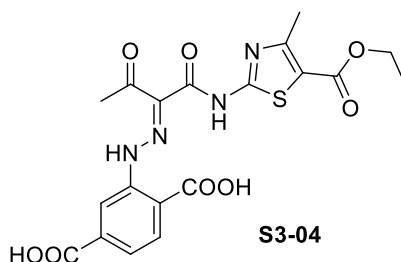

**(E)-2-(2-(1-((5-(ethoxycarbonyl)-4-methylthiazol-2-yl)amino)-1,3-dioxobutan-2-ylidene)hydrazinyl)-5-hydroxybenzoic acid: S3-05**

**S3-05** was synthesized according to the general procedure as brown solid with 70% yield.

$^1\text{H}$  NMR (500 MHz,  $\text{DMSO-}d_6$ )  $\delta$  12.89 (s, 1H), 9.69 (s, 1H), 7.68 (d,  $J = 10.0$  Hz, 1H), 7.44 (s, 1H), 6.91 (d,  $J = 10.0$  Hz, 1H), 4.25 (q,  $J = 5.0$  Hz, 2H), 2.55 (s, 3H), 2.51 (s, 3H), 1.30 (t,  $J = 5.0$  Hz, 3H).

$^{13}\text{C}$  NMR (126 MHz,  $\text{DMSO-}d_6$ )  $\delta$  198.87, 168.85, 162.52, 157.00, 155.66, 137.24, 128.12, 123.49, 118.85, 117.57, 116.51, 114.68, 60.95, 26.39, 17.43, 14.68.

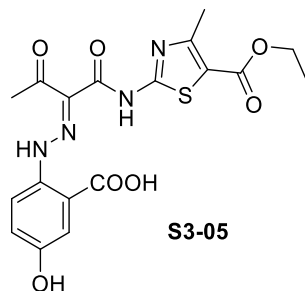

**Ethyl (E)-2-(2-(2-(2-hydroxyphenyl)hydrazono)-3-oxobutanamido)-4-methylthiazole-5-carboxylate: S3-06**

S3-06 was synthesized according to the general procedure as yellow solid with 88% yield.

$^1\text{H}$  NMR (500 MHz, DMSO- $d_6$ )  $\delta$  14.09 (s, 1H), 12.70 (s, 1H), 10.66 (s, 1H), 7.65 (d,  $J$  = 10.0 Hz, 1H), 7.12 (t,  $J$  = 10.0 Hz, 1H), 7.02 (d,  $J$  = 10.0 Hz, 1H), 6.96 (t,  $J$  = 10.0 Hz, 1H), 4.26 (q,  $J$  = 5.0 Hz, 2H), 2.57 (s, 3H), 2.54 (s, 3H), 1.31 (t,  $J$  = 5.0 Hz, 3H).

$^{13}\text{C}$  NMR (126 MHz, DMSO- $d_6$ )  $\delta$  199.31, 162.27, 161.58, 157.02, 147.20, 129.52, 127.24, 120.76, 116.43, 115.78, 115.48, 61.19, 31.16, 26.21, 17.41, 14.66.

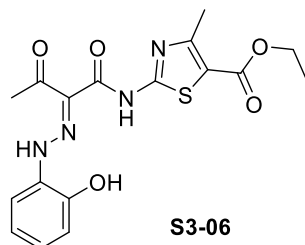

**Ethyl (E)-2-(2-(2-(2-(hydroxymethyl)phenyl)hydrazono)-3-oxobutanamido)-4-methylthiazole-5-carboxylate: S3-07**

S3-07 was synthesized according to the general procedure as yellow solid with 88% yield.

$^1\text{H}$  NMR (500 MHz, DMSO- $d_6$ )  $\delta$  14.34 (s, 1H), 12.64 (s, 1H), 7.79 (d,  $J$  = 10.0 Hz, 1H), 7.45 (t,  $J$  = 10.0 Hz, 1H), 7.36 (d,  $J$  = 10.0 Hz, 1H), 7.22 (t,  $J$  = 10.0 Hz, 1H), 4.71 (d,  $J$  = 5.0 Hz, 2H), 4.26 (q,  $J$  = 5.0 Hz, 2H), 2.57 (s, 3H), 2.55 (s, 3H), 1.30 (t,  $J$  = 5.0 Hz, 3H).

$^{13}\text{C}$  NMR (126 MHz, DMSO- $d_6$ )  $\delta$  199.58, 162.31, 160.87, 157.64, 157.04, 140.90, 130.17, 129.37, 129.28, 126.00, 125.49, 116.23, 115.71, 62.14, 61.18, 26.36, 17.42, 14.70.

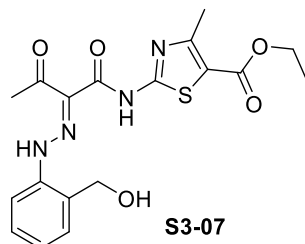

**(E)-2-(2-(1-((4-methylthiazol-2-yl)amino)-1,3-dioxobutan-2-ylidene)hydrazinyl)benzoic acid: S3-08**

S3-08 was synthesized according to the general procedure as yellow solid with 57% yield.

$^1\text{H}$  NMR (400 MHz, DMSO- $d_6$ )  $\delta$  14.18 (s, 1H), 13.20 (bs, 1H), 7.98 (d,  $J$  = 8.0 Hz, 1H), 7.92 (d,  $J$  = 8.0 Hz, 1H), 7.68 (t,  $J$  = 8.0 Hz, 1H), 7.23 (s, 1H), 7.17 (t,  $J$  = 8.0 Hz, 1H), 2.60 (s, 3H), 2.37 (s, 3H).

$^{13}\text{C}$  NMR (100 MHz, DMSO- $d_6$ )  $\delta$  198.75, 170.76, 169.12, 150.93, 144.68, 135.01, 131.78, 113.87,

17.71.

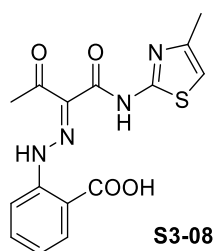

**(E)-2-(2-(1,3-dioxo-1-(thiazol-2-ylamino)butan-2-ylidene)hydrazinyl)benzoic acid: S3-09**

**S3-09** was synthesized according to the general procedure as yellow solid with 65% yield.

$^1\text{H}$  NMR (500 MHz, DMSO- $d_6$ )  $\delta$  15.69 (s, 1H), 12.48 (bs, 1H), 8.02 (d,  $J$  = 10.0 Hz, 1H), 7.92 (d,  $J$  = 10.0 Hz, 1H), 7.62 (d,  $J$  = 10.0 Hz, 1H), 7.59 (t,  $J$  = 10.0 Hz, 1H), 7.55 (t,  $J$  = 10.0 Hz, 1H), 7.22 (d,  $J$  = 10.0 Hz, 1H), 2.57 (s, 3H).

$^{13}\text{C}$  NMR (126 MHz, DMSO- $d_6$ )  $\delta$  199.45, 168.88, 159.60, 156.55, 143.88, 138.61, 133.32, 131.90, 126.97, 124.57, 115.40, 115.03, 26.49.

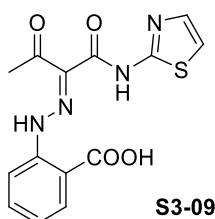

**(E)-2-(2-(1-((5-(ethoxycarbonyl)-4-methylthiazol-2-yl)amino)-1,3-dioxobutan-2-ylidene)hydrazinyl)-4-methylbenzoic acid: S3-10**

**S3-10** was synthesized according to the general procedure as yellow solid with 56% yield.

$^1\text{H}$  NMR (500 MHz, DMSO- $d_6$ )  $\delta$  15.18 (s, 1H), 12.57 (bs, 1H), 7.91 (d,  $J$  = 10.0 Hz, 1H), 7.78 (s, 1H), 7.12 (d,  $J$  = 5.0 Hz, 1H), 4.27 (q,  $J$  = 10.0 Hz, 2H), 2.59 (s, 3H), 2.58 (s, 3H), 2.44 (s, 3H), 1.31 (t,  $J$  = 10.0 Hz, 3H).

$^{13}\text{C}$  NMR (126 MHz, DMSO- $d_6$ )  $\delta$  156.85, 125.99, 115.94, 61.19, 26.52, 22.06, 17.42, 14.67.

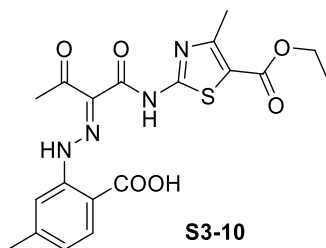

**(E)-2-(2-(1-((5-(ethoxycarbonyl)-4-methylthiazol-2-yl)amino)-1,3-dioxobutan-2-ylidene)hydrazinyl)-3-methylbenzoic acid: S3-11**

**S3-11** was synthesized according to the general procedure as yellow solid with 65% yield.

$^1\text{H}$  NMR (500 MHz, DMSO- $d_6$ )  $\delta$  12.77 (bs, 1H), 7.82 (s, 1H), 7.71 (s, 1H), 7.31 (d,  $J$  = 10.0 Hz, 1H), 4.22 (q,  $J$  = 5.0 Hz, 2H), 2.51 (s, 3H), 2.32 (s, 3H), 2.17 (s, 3H), 1.26 (t,  $J$  = 5.0 Hz, 3H).

$^{13}\text{C}$  NMR (126 MHz, DMSO- $d_6$ )  $\delta$  195.28, 159.53, 151.16, 142.87, 132.19, 114.87, 60.99, 26.39, 17.40, 14.60.

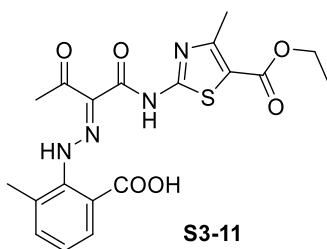

**Sodium (E)-2-(2-(1-((4-methylthiazol-2-yl)amino)-1,3-dioxobutan-2-ylidene)hydrazinyl)benzoate: S3-12**

Compound **S3-08** (1 eq.) and NaOH (1 eq.) were added into *t*-BuOH, stirred at 120 °C for 8h. Removing the solvent to afford desired compounds. Yellow solid with 95% yield. <sup>1</sup>H NMR (500 MHz, DMSO-*d*<sub>6</sub>) δ 12.85 (s, 1H), 7.80 (s, 1H), 7.71 (d, *J* = 10.0 Hz, 2H), 7.28 (d, *J* = 10.0 Hz, 2H), 2.56 (s, 3H), 2.51 (s, 3H). <sup>13</sup>C NMR (126 MHz, DMSO-*d*<sub>6</sub>) δ 132.19, 114.72, 60.99, 26.43, 21.09, 17.43, 14.69.

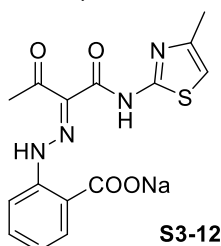

**(E)-2-(2-(1-((5-(ethoxycarbonyl)-4-methylthiazol-2-yl)amino)-1,3-dioxobutan-2-ylidene)hydrazinyl)-5-methylbenzoic acid: S3-13**

**S3-13** was synthesized according to the general procedure as yellow solid with 47% yield. <sup>1</sup>H NMR (400 MHz, DMSO-*d*<sub>6</sub>) δ 12.88 (s, 1H), 7.80 (s, 1H), 7.71 (d, *J* = 4.0 Hz, 1H), 7.28 (d, *J* = 4.0 Hz, 1H), 4.24 (q, *J* = 8.0 Hz, 2H), 2.56 (s, 3H), 2.53 (s, 3H), 2.32 (s, 3H), 1.30 (t, *J* = 8.0 Hz, 3H). <sup>13</sup>C NMR (100 MHz, DMSO-*d*<sub>6</sub>) δ 198.97, 162.52, 156.98, 134.14, 132.37, 132.14, 114.77, 60.97, 26.42, 21.08, 17.42, 14.68.

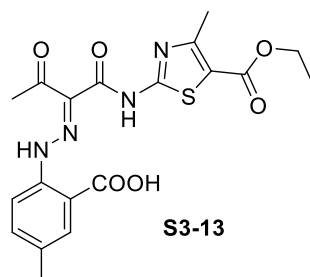

**(E)-2-(2-(1-((5-(ethoxycarbonyl)-4-methylthiazol-2-yl)amino)-1,3-dioxobutan-2-ylidene)hydrazinyl)-5-fluorobenzoic acid: S3-14**

**S3-14** was synthesized according to the general procedure as yellow solid with 54% yield. <sup>1</sup>H NMR (400 MHz, DMSO-*d*<sub>6</sub>) δ 12.69 (s, 1H), 7.82 (dd, *J* = 4.0 Hz and 8.0 Hz, 1H), 7.68 (d, *J* = 4.0 Hz and 8.0 Hz, 1H), 7.31 (td, *J* = 4.0 Hz and 8.0 Hz, 1H), 4.24 (q, *J* = 8.0 Hz, 2H), 2.56 (s, 3H), 2.53 (s, 3H), 1.30 (t, *J* = 8.0 Hz, 3H). <sup>13</sup>C NMR (100 MHz, DMSO-*d*<sub>6</sub>) δ 199.21, 167.43, 162.43, 159.63, 158.38, 156.95, 140.80, 127.97, 125.39, 118.64, 117.55, 116.95, 115.00, 61.02, 26.41, 17.39, 14.65.

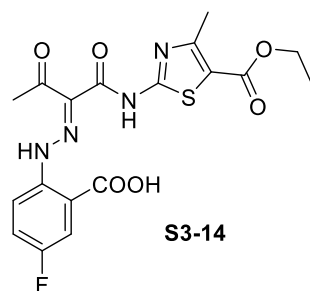

**(E)-2-(2-(1,3-dioxo-1-(pyridin-2-ylamino)butan-2-ylidene)hydrazinyl)benzoic acid: S3-15**

**S3-15** was synthesized according to the general procedure as yellow solid with 70% yield.

$^1\text{H}$  NMR (500 MHz,  $\text{DMSO-}d_6$ )  $\delta$  11.62 (s, 1H), 8.36 (bs, 1H), 8.25 (d,  $J = 5.0$  Hz, 1H), 7.97 (d,  $J = 10.0$  Hz, 1H), 7.84 (t,  $J = 10.0$  Hz, 1H), 7.79 (d,  $J = 10.0$  Hz, 1H), 7.42 (t,  $J = 10.0$  Hz, 1H), 7.16-7.09 (m, 1H), 2.55 (s, 3H).

$^{13}\text{C}$  NMR (126 MHz,  $\text{DMSO-}d_6$ )  $\delta$  148.84, 138.73, 120.22, 114.46, 26.66.

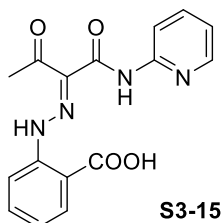

**(E)-2-(2-(1-(benzo[d]thiazol-2-ylamino)-1,3-dioxobutan-2-ylidene)hydrazinyl)benzoic acid: S3-16**

**S3-16** was synthesized according to the general procedure as yellow solid with 50% yield.

$^1\text{H}$  NMR (500 MHz,  $\text{DMSO-}d_6$ )  $\delta$  12.87 (s, 1H), 8.00 (d,  $J = 10.0$  Hz, 1H), 7.82 (d,  $J = 5.0$  Hz, 1H), 7.78 (d,  $J = 10.0$  Hz, 1H), 7.47 (q,  $J = 5.0$  Hz, 2H), 7.33 (t,  $J = 5.0$  Hz, 1H), 7.17 (t,  $J = 10.0$  Hz, 1H), 2.58 (s, 3H).

$^{13}\text{C}$  NMR (126 MHz,  $\text{DMSO-}d_6$ )  $\delta$  199.17, 168.73, 149.12, 145.46, 132.28, 131.93, 131.37, 126.62, 124.00, 122.15, 120.99, 114.61, 26.52.

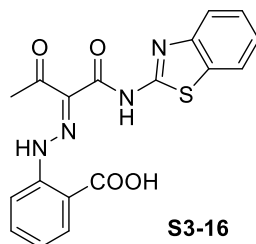

**(E)-2-(2-(1-(3,4-dihydroisoquinolin-2(1H)-yl)-1,3-dioxobutan-2-ylidene)hydrazinyl)benzoic acid: S3-17**

**S3-17** was synthesized according to the general procedure as yellow solid with 56% yield.

$^1\text{H}$  NMR (500 MHz,  $\text{DMSO-}d_6$ )  $\delta$  15.29 (s, 1H), 15.18 (s, 1H), 8.36 (bs, 1H), 7.87 (t,  $J = 10.0$  Hz, 1H), 7.60 (d,  $J = 5.0$  Hz, 1H), 7.34-7.09 (m, 5H), 7.84 (t,  $J = 10.0$  Hz, 1H), 6.90 (t,  $J = 10.0$  Hz, 1H), 4.41 (s, 1H), 3.84 (s, 1H), 3.44 (t,  $J = 5.0$  Hz, 1H), 3.44 (s, 2H), 2.76 (t,  $J = 5.0$  Hz, 1H), 2.43 (s, 3H).

$^{13}\text{C}$  NMR (126 MHz,  $\text{DMSO-}d_6$ )  $\delta$  194.57, 194.38, 170.11, 164.04, 145.10, 145.02, 138.62, 138.57, 134.69, 133.07, 131.86, 130.95, 129.03, 128.92, 127.02, 126.93, 126.78, 126.61, 126.50, 123.42, 120.95, 112.70, 112.64, 46.48, 43.47, 43.21, 29.61, 28.30, 24.79, 24.76.

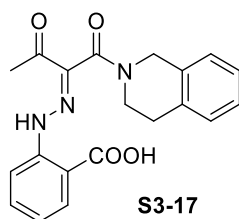

**(E)-2-(2-(1-morpholino-1,3-dioxobutan-2-ylidene)hydrazinyl)benzoic acid: S3-18**

**S3-18** was synthesized according to the general procedure as white solid with 81% yield. <sup>1</sup>H NMR (500 MHz, DMSO-*d*<sub>6</sub>) δ 12.87 (s, 1H), 8.00 (d, *J* = 0.0 Hz, 1H), 7.82 (d, *J* = 5.0 Hz, 1H), 7.78 (d, *J* = 10.0 Hz, 1H), 7.47 (q, *J* = 5.0 Hz, 2H), 7.33 (t, *J* = 5.0 Hz, 1H), 7.17 (t, *J* = 10.0 Hz, 1H), 2.58 (s, 3H), <sup>13</sup>C NMR (126 MHz, DMSO-*d*<sub>6</sub>) δ 194.40, 163.22, 144.96, 138.21, 131.92, 131.09, 121.03, 112.77, 66.71, 66.03, 46.24, 41.60, 24.69

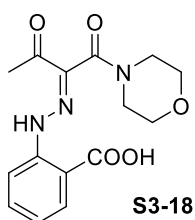

**(E)-2-(2-(1-((5-(ethoxycarbonyl)-4-methylthiazol-2-yl)amino)-1,3-dioxobutan-2-ylidene)hydrazinyl)isophthalic acid: S3-19**

**S3-19** was synthesized according to the general procedure as orange solid with 66% yield. <sup>1</sup>H NMR (500 MHz, DMSO-*d*<sub>6</sub>) δ 7.79-7.78 (bs, 2H), 7.21 (t, *J* = 5.0 Hz, 1H), 4.26 (q, *J* = 5.0 Hz, 2H), 2.57 (s, 3H), 2.41 (s, 3H), 1.30 (t, *J* = 5.0 Hz, 3H). <sup>13</sup>C NMR (126 MHz, DMSO-*d*<sub>6</sub>) δ 199.50, 169.29, 162.52, 159.74, 158.73, 156.94, 143.49, 132.33, 126.86, 126.16, 124.07, 114.89, 60.97, 26.42, 17.42, 14.68.

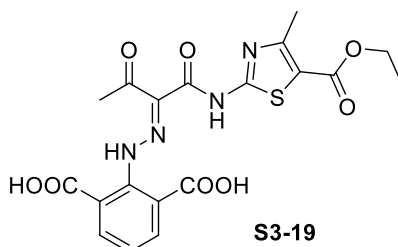

**(E)-2-(2-(1-((4-methyl-5-(morpholine-4-carbonyl)thiazol-2-yl)amino)-1,3-dioxobutan-2-ylidene)hydrazinyl)benzoic acid: S3-20**

**S3-20** was synthesized according to the general procedure as yellow solid with 32% yield. <sup>1</sup>H NMR (500 MHz, DMSO-*d*<sub>6</sub>) δ 15.06 (bs, 1H), 7.90 (d, *J* = 10.0 Hz, 1H), 7.59 (d, *J* = 10.0 Hz, 1H), 7.34 (t, *J* = 10.0 Hz, 1H), 6.91 (t, *J* = 10.0 Hz, 1H), 3.73-3.53 (m, 8H), 3.19 (s, 3H), 2.40 (s, 3H). <sup>13</sup>C NMR (126 MHz, DMSO-*d*<sub>6</sub>) δ 194.39, 170.08, 163.22, 144.99, 138.17, 131.90, 131.08, 123.08, 121.02, 112.73, 66.70, 65.99, 46.22, 41.57, 24.70.



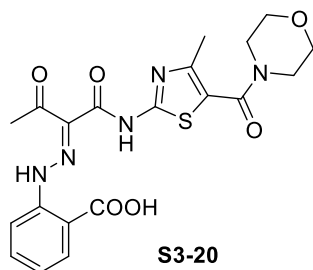

**(E)-2-(2-(1-((5-(ethoxycarbonyl)-4-methylthiazol-2-yl)amino)-1,3-dioxobutan-2-ylidene)hydrazinyl)-5-methoxybenzoic acid: S3-21**

**S3-21** was synthesized according to the general procedure as red solid with 61% yield.

$^1\text{H}$  NMR (500 MHz,  $\text{DMSO-}d_6$ )  $\delta$  12.86 (s, 1H), 7.76 (d,  $J = 10.0$  Hz, 1H), 7.54 (s, 1H), 7.06 (d,  $J = 10.0$  Hz, 1H), 4.25 (q,  $J = 5.0$  Hz, 2H), 3.80 (s, 3H), 2.57 (s, 3H), 2.53 (s, 3H), 1.31 (t,  $J = 5.0$  Hz, 3H).

$^{13}\text{C}$  NMR (126 MHz,  $\text{DMSO-}d_6$ )  $\delta$  198.89, 162.53, 157.05, 157.00, 118.25, 116.40, 115.11, 60.97, 55.73, 26.40, 17.42, 14.68.

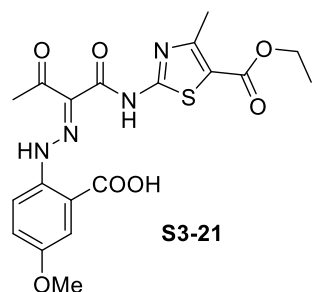

**(Z)-2-(2-(1-((5-(ethoxycarbonyl)-4-methylthiazol-2-yl)amino)-3-isopropoxy-1,3-dioxopropan-2-ylidene)hydrazinyl)benzoic acid: S3-22**

**S3-22** was synthesized according to the general procedure as yellow solid with 62% yield.

$^1\text{H}$  NMR (500 MHz,  $\text{DMSO-}d_6$ )  $\delta$  12.64 (s, 1H), 8.02 (d,  $J = 10.0$  Hz, 1H), 7.82 (d,  $J = 10.0$  Hz, 1H), 7.48 (t,  $J = 10.0$  Hz, 1H), 7.17 (t,  $J = 10.0$  Hz, 1H), 3.62 (d,  $J = 5.0$  Hz, 3H), 3.54 (d,  $J = 5.0$  Hz, 3H), 2.56 (s, 3H), 2.29 (t,  $J = 5.0$  Hz, 3H).

$^{13}\text{C}$  NMR (126 MHz,  $\text{DMSO-}d_6$ )  $\delta$  199.09, 169.45, 162.85, 159.53, 156.27, 147.84, 144.72, 132.01, 131.62, 124.48, 118.58, 114.76, 66.67, 26.43, 16.77.

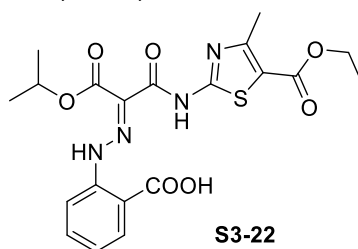

**(E)-2-(2-(1-((5-cyanopyridin-2-yl)amino)-1,3-dioxobutan-2-ylidene)hydrazinyl)benzoic acid: S3-15-1**

**S3-15-1** was synthesized according to the general procedure as yellow solid with 55% yield.

$^1\text{H}$  NMR (500 MHz,  $\text{DMSO-}d_6$ )  $\delta$  12.02 (s, 1H), 8.77 (s, 1H), 8.34 (d,  $J = 10.0$  Hz, 1H), 8.24 (s, 1H), 7.98 (d,  $J = 10.0$  Hz, 1H), 7.78 (d,  $J = 10.0$  Hz, 1H), 7.44 (t,  $J = 10.0$  Hz, 1H), 7.14 (t,  $J = 10.0$  Hz, 1H), 2.54 (s, 3H).

$^{13}\text{C}$  NMR (126 MHz,  $\text{DMSO-}d_6$ )  $\delta$  199.37, 169.17, 160.97, 154.17, 152.74, 143.83, 142.50, 132.03, 131.24, 126.41, 124.42, 117.68, 114.64, 113.78, 104.09, 26.65.

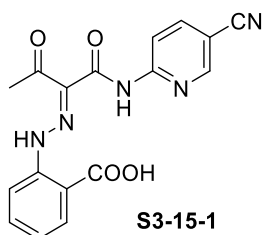

**(E)-2-(2-(1-((6-(methoxycarbonyl)pyridin-2-yl)amino)-1,3-dioxobutan-2-ylidene)hydrazinyl)benzoic acid: S3-15-2**

**S3-15-2** was synthesized according to the general procedure as yellow solid with 34% yield.

$^1\text{H NMR}$  (500 MHz,  $\text{DMSO-}d_6$ )  $\delta$  11.72 (s, 1H), 8.45 (d,  $J = 10.0$  Hz, 1H), 8.34 (d,  $J = 10.0$  Hz, 1H), 8.05 (t,  $J = 10.0$  Hz, 1H), 7.96 (d,  $J = 10.0$  Hz, 1H), 7.82-7.79 (m, 2H), 7.43 (t,  $J = 10.0$  Hz, 1H), 7.11 (t,  $J = 10.0$  Hz, 1H), 3.90 (s, 3H), 2.55 (s, 3H).

$^{13}\text{C NMR}$  (126 MHz,  $\text{DMSO-}d_6$ )  $\delta$  212.17, 193.55, 165.24, 158.59, 146.52, 140.16, 131.98, 118.13, 106.07, 94.02, 83.93, 52.94, 26.61.

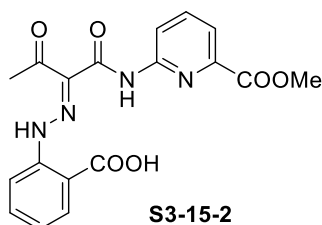

**(E)-2-(2-(1,3-dioxo-1-(pyridin-2-ylamino)butan-2-ylidene)hydrazinyl)-5-hydroxybenzoic acid: S3-15-3**

**S3-15-3** was synthesized according to the general procedure as yellow solid with 71% yield.

$^1\text{H NMR}$  (500 MHz,  $\text{DMSO-}d_6$ )  $\delta$  11.79 (s, 1H), 9.77 (s, 1H), 8.32 (d,  $J = 10.0$  Hz, 1H), 8.23 (d,  $J = 10.0$  Hz, 1H), 7.76 (t,  $J = 10.0$  Hz, 1H), 7.66 (d,  $J = 10.0$  Hz, 1H), 7.10 (t,  $J = 10.0$  Hz, 1H), 6.91 (d,  $J = 10.0$  Hz, 1H), 2.51 (s, 3H).

$^{13}\text{C NMR}$  (126 MHz,  $\text{DMSO-}d_6$ )  $\delta$  198.96, 169.44, 161.18, 155.17, 151.66, 148.76, 138.63, 135.70, 128.30, 124.73, 120.07, 118.50, 117.90, 116.32, 114.38, 26.64.

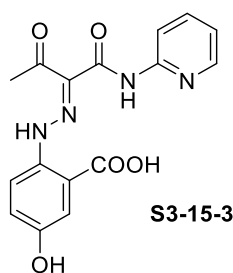

**(Z)-2-(2-(1-isopropoxy-1,3-dioxo-3-(pyridin-2-ylamino)propan-2-ylidene)hydrazinyl)benzoic acid: S3-15-4**

**S3-15-4** was synthesized according to the general procedure as yellow solid with 68% yield.

$^1\text{H NMR}$  (500 MHz,  $\text{DMSO-}d_6$ )  $\delta$  11.27 (s, 1H), 8.35 (s, 1H), 8.24-8.12 (m, 1H), 7.97-7.92 (m, 1H), 7.84 (t,  $J = 10.0$  Hz, 1H), 7.72 (t,  $J = 10.0$  Hz, 1H), 7.42-7.35 (m, 1H), 7.16 (t,  $J = 10.0$  Hz, 1H), 7.07-6.95 (m, 1H), 5.19-5.11 (m, 1H), 1.34 (s, 6H).

$^{13}\text{C NMR}$  (126 MHz,  $\text{DMSO-}d_6$ )  $\delta$  169.43, 151.59, 148.80, 148.58, 138.75, 132.06, 131.89, 130.84, 123.30, 120.31, 114.22, 113.79, 69.43, 68.88, 22.20, 21.96.

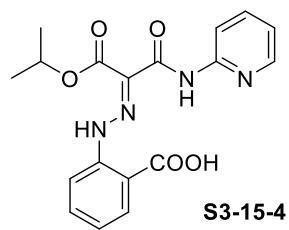

Supplement: 41467_2022_33006_MOESM1_ESM.pdf [file 41467_2022_33006_MOESM1_ESM.pdf]
